# Supplementary material for: Seasonal development of iron limitation in the sub-Antarctic zone
Source: Copernicus journal article supplement (doi:10.5194/bg-15-4647-2018), 2018-07-30
Supplement: Supplementary file 1 [file bg-15-4647-2018-supplement.zip]

Archive with 3 entries (3 files):
- bg-15-4647-2018-supplement-title-page.pdf
- bg-2017-551-supplement-version4.pdf
- Metasheets for Supplementary.xlsx
