# Supplementary material for: Seasonal development of iron limitation in the sub-Antarctic zone
Source: Copernicus journal article supplement (doi:10.5194/bg-15-4647-2018), 2018-07-30
Supplement: Supplementary file 1 [file bg-15-4647-2018-supplement.zip › bg-15-4647-2018-supplement-title-page.pdf]

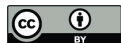

## *Supplement of*

# **Seasonal development of iron limitation in the sub-Antarctic zone**

**Thomas J. Ryan-Keogh et al.**

*Correspondence to:* Thomas J. Ryan-Keogh ([tryankeogh@csir.co.za](mailto:tryankeogh@csir.co.za))

- [bg-15-4647-2018-supplement-title-page.pdf](#)
- [Metasheets for Supplementary.xlsx](#)
- [bg-2017-551-supplement-version4.pdf](#)

The copyright of individual parts of the supplement might differ from the CC BY 4.0 License.
