# Supplementary material for: Seasonal development of iron limitation in the sub-Antarctic zone
Source: Copernicus journal article supplement (doi:10.5194/bg-15-4647-2018), 2018-07-30
Supplement: Supplementary file 1 [file bg-15-4647-2018-supplement.zip › bg-2017-551-supplement-version4.pdf]

# Seasonal development of iron limitation in the sub-Antarctic zone

Thomas J. Ryan-Keogh<sup>1,2</sup>, S. J. Thomalla<sup>1,2</sup>, T. N. Mtshali<sup>1</sup>, N. R. van Horsten<sup>1,3</sup>, H. Little<sup>2</sup>

## Supplementary Information

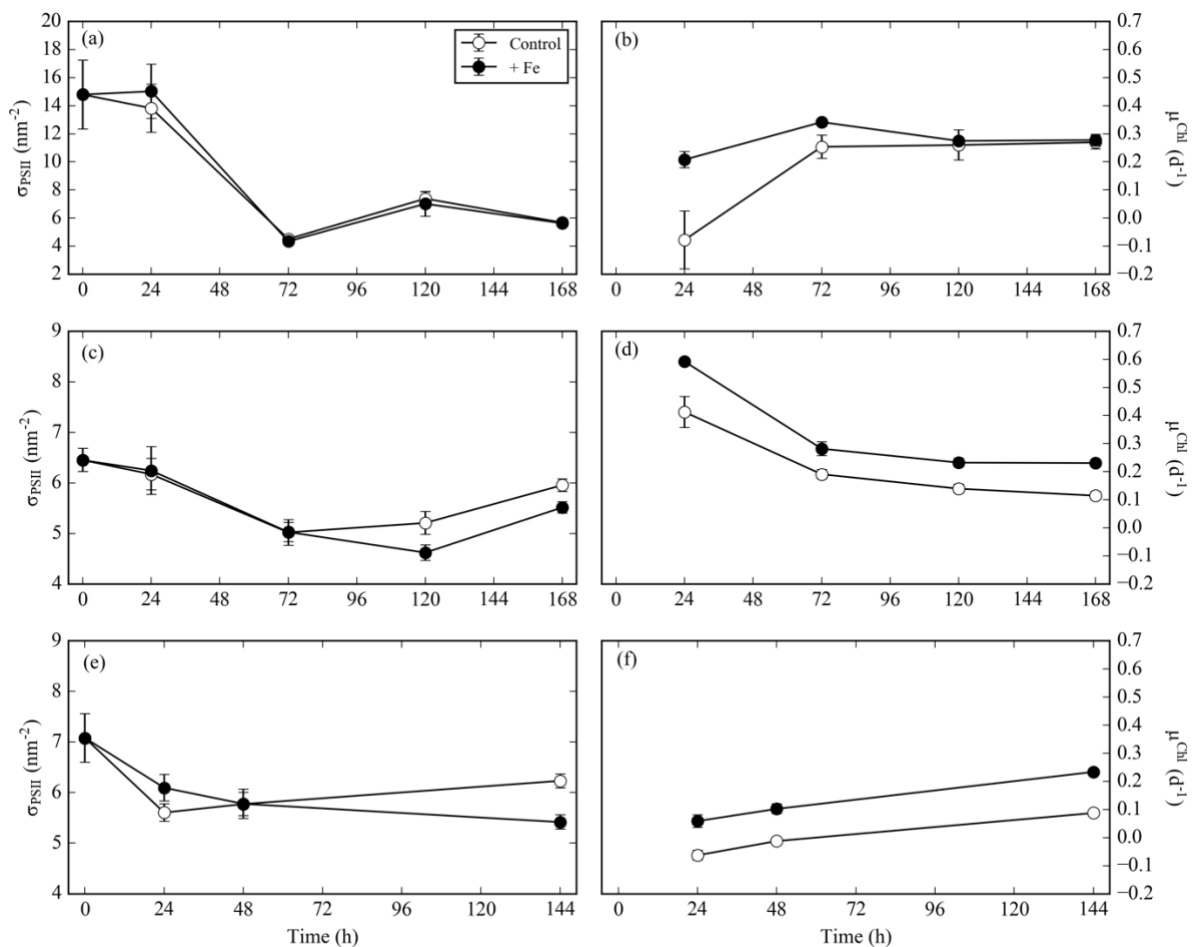

**Figure S1:  $\sigma_{PSII}$  (nm<sup>-2</sup>) (a, c, e) and chlorophyll-a specific growth rates (d<sup>-1</sup>) (b, d, f), from the control and Fe addition treatments of experiments initiated in the sub-Antarctic zone over early summer (a, b), mid-summer (c, d), and late summer (e, f). Displayed here are averages with  $\pm$  standard deviations ( $n = 3$  for all time points, except end time point where  $n = 5$ ). Please note the different scale in panel a, compared to c and e.**

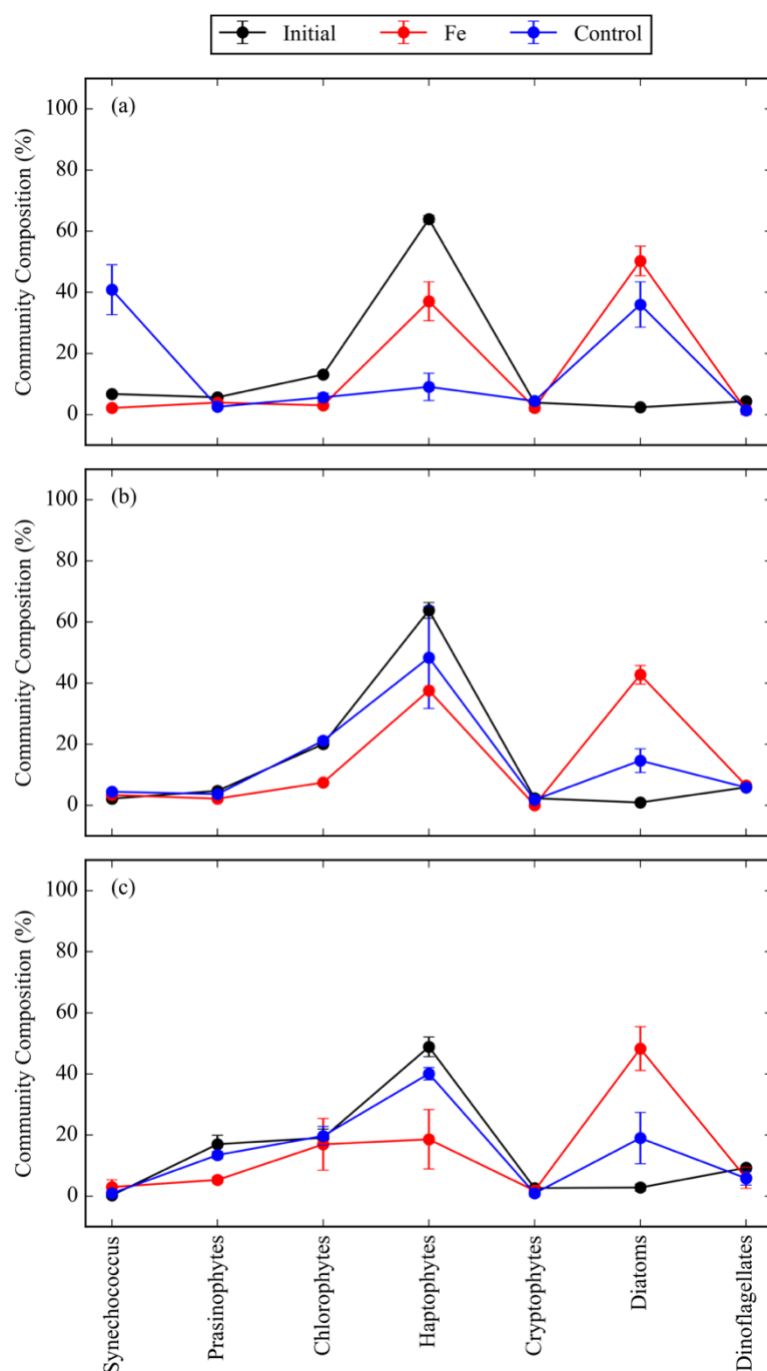

**Figure S2: Community composition as a percentage of total chlorophyll a, determined by HPLC (Ras et al., 2008) and CHEMTAX (Mackey et al., 1996), of experiments initiated in (a) early summer, (b) mid-summer and (c) late summer. Initial community composition in black (t = 0 h), with end time point (t = 168, 168 and 144 h respectively) compositions for the iron addition treatment in red, and the control treatment in blue. Displayed here are averages with  $\pm$  standard deviations, where  $n = 3$ .**

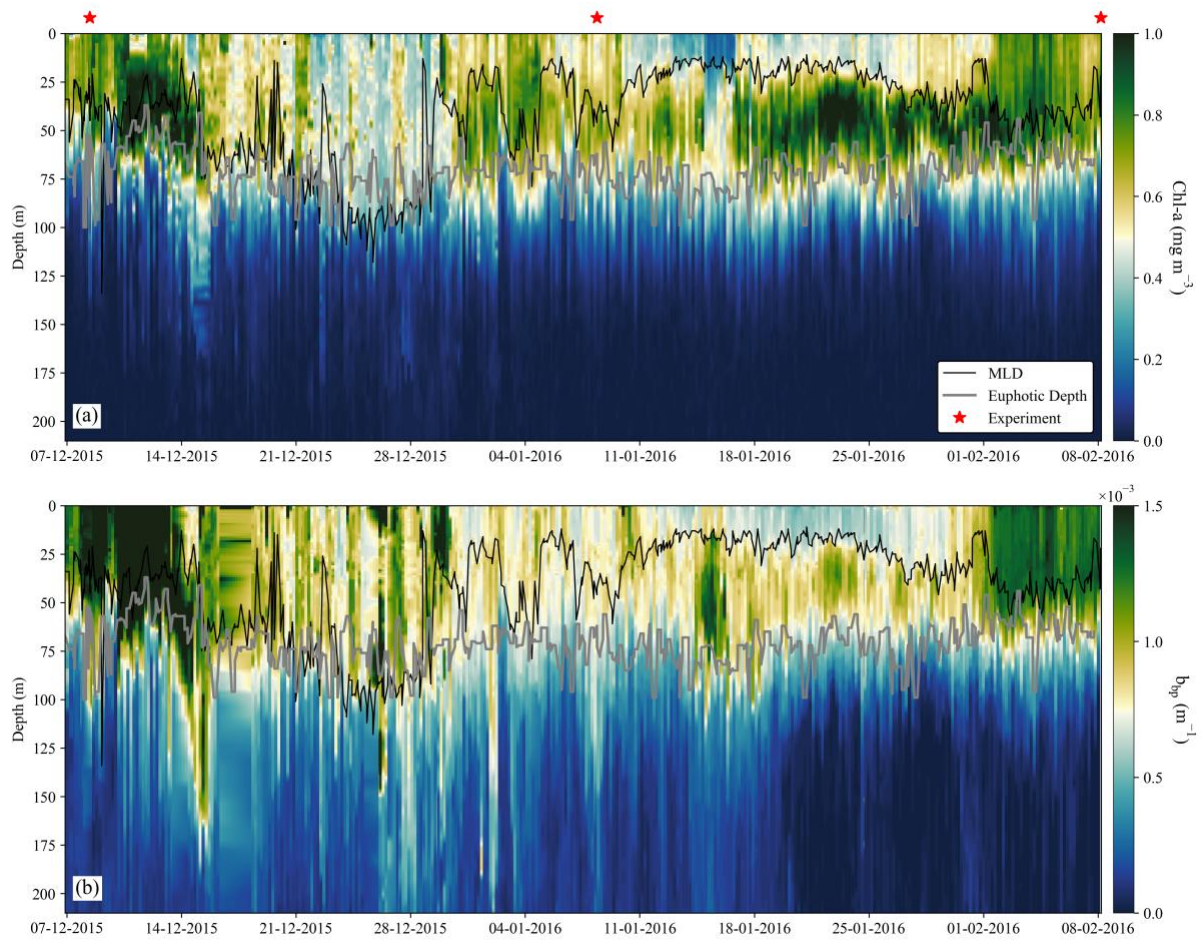

**Figure S3: Sections for the glider time series from 7 December 2015 to 8 February 2016 of (a) chlorophyll concentration (Chl-a ( $\text{mg m}^{-3}$ )) and (b) particulate backscatter ( $b_p$  ( $\text{m}^{-1}$ )); overlaid with the mixed layer depth (MLD) and the euphotic depth. The red stars indicate the initiation date for the experiments.**

| Experiment                                                        | Variable  | Timepoints (h) |     |     |     |     |     |     |
|-------------------------------------------------------------------|-----------|----------------|-----|-----|-----|-----|-----|-----|
|                                                                   |           | 0              | 24  | 48  | 72  | 120 | 144 | 168 |
| <b>1</b><br><b>Fe = 16 bottles</b><br><b>Control = 16 bottles</b> | FRRf      | 3              | 3   | n/a | 3   | 3   | n/a | 6   |
|                                                                   | Chl-a     | 3              | 3   | n/a | 3   | 3   | n/a | 6   |
|                                                                   | Nutrients | 3              | 3   | n/a | 3   | 3   | n/a | 6   |
|                                                                   | HPLC      | 3              | n/a | n/a | n/a | n/a | n/a | 3   |
| <b>2</b><br><b>Fe = 16 Bottles</b><br><b>Control = 16 Bottles</b> | FRRf      | 3              | 3   | n/a | 3   | 5   | n/a | 10  |
|                                                                   | Chl-a     | 3              | 3   | n/a | 3   | 5   | n/a | 10  |
|                                                                   | Nutrients | 3              | 3   | n/a | 3   | 3   | n/a | 7   |
|                                                                   | HPLC      | 3              | n/a | n/a | n/a | 2   | n/a | 3   |
| <b>3</b><br><b>Fe = 16 Bottles</b><br><b>Control = 16 Bottles</b> | FRRf      | 3              | 5   | 5   | n/a | n/a | 12  | n/a |
|                                                                   | Chl-a     | 3              | 5   | 5   | n/a | n/a | 12  | n/a |
|                                                                   | Nutrients | 3              | 3   | 3   | n/a | n/a | 6   | n/a |
|                                                                   | HPLC      | 3              | n/a | n/a | n/a | n/a | 3   | n/a |

29

30 **Table S1: Sub-sampling strategy for biological replicates of variables measured within**  
31 **each experiment. The number of samples collected for each variable at each timepoint is**  
32 **listed, where samples were not collected is denoted by ‘n/a’.**
