# Supplementary material for: Seasonal development of iron limitation in the sub-Antarctic zone
Source: Copernicus journal article supplement (doi:10.5194/bg-15-4647-2018), 2018-07-30
Supplement: Supplementary file 1 [file Metasheets for Supplementary.xlsx]

## Sheet: Metadata
Experiment	Date
1	2015-12-08
2	2016-01-05
3	2016-02-08
Variable	Units
Fo, Fm, Fv/Fm	a.u.
Sig	nm^-2
Chl	mg m^-3
Nitrate	μM
CHEMTAX	% of Chl-a
MLD	m
Wind Stress	N m^-2
Key
	Flagged
NaN	Missing Data

## Sheet: EXP1
										CHEMTAX
Bottle	Treatment	Time (h)	Sigma	Fo	Fm	Fv/Fm	Chl	Nitrate	HPLC	Prasinophytes	Chlorophytes	Cryptophytes	Diatoms	Dinoflagellates	Haptophytes	Synechococcus
0	Initial	0	14.9	0.756041	0.952041	0.205873	0.947279	4.28571	x	5.63438	12.8771	3.68742	1.96978	4.6457	64.8212	6.36443
0	Initial	0	12.28	0.73703	0.84703	0.129866	1.05113	7.14286	x	5.62767	12.939	4.22748	3.14179	4.35443	62.9349	6.77482
0	Initial	0	17.19	0.711034	0.937034	0.241187	0.937848	7.14286	x	5.64657	13.442	3.72351	2.02891	4.00739	64.1414	7.01018
1	Fe	24	16.62	0.834658	1.00466	0.169212	1.14521	6
2	Fe	24	15.57	0.897236	1.04624	0.142415	1.26404	5.85714
3	Fe	24	12.88	0.831391	1.03339	0.195473	1.20845	5.85714
1	Control	24	14.67	0.863557	1.07156	0.19411	1.02483	6.71429
2	Control	24	14.95	0.724696	0.892696	0.188194	0.980896	7.28571
3	Control	24	11.84	0.733079	0.946379	0.225385	0.738695	10.7143
1	Fe	72	4.5	0.967413	1.51341	0.360774	2.91107	6
2	Fe	72	4.28	0.943282	1.53728	0.386396	2.64124	3.71429
3	Fe	72	4.25	0.965356	1.52536	0.367127	2.63813	3.57143
1	Control	72	4.4	1.00335	1.53135	0.344794	2.41124	7.42857
2	Control	72	4.62	0.983484	1.48348	0.337044	1.93827	4.14286
3	Control	72	4.51	0.870619	1.33062	0.345704	1.96623	7.71429
1	Fe	120	6.16	1.40177	2.18977	0.359854	4.1041	0.214286
2	Fe	120	6.96	1.47756	2.33356	0.366822	3.75539	4.57143
3	Fe	120	7.93	1.77699	2.50399	0.290337	3.74329	0.142857
1	Control	120	7.27	1.71508	2.48208	0.309015	3.54625	1.85714
2	Control	120	6.96	1.52609	2.25409	0.322968	2.76828	4.25
3	Control	120	7.92	2.18404	3.18104	0.31342	4.71376	2.28571
1	Fe	168	5.83	3.28449	5.13349	0.360184	8.57255	0.214286
2	Fe	168	5.91	3.35161	5.04361	0.335474	6.22344	0.285714
3	Fe	168	5.88	3.95025	5.66325	0.302476	7.04701	0.428571
4	Fe	168	5.68	3.68827	5.52027	0.331868	6.12114	0.285714	x	3.38555	4.06169	0	47.3836	0	43.3412	1.8279
5	Fe	168	5.3	2.11561	3.25861	0.350763	4.16612	0.214286	x	5.45535	3.3611	3.24417	48.976	4.40877	31.3433	3.21125
6	Fe	168	5.16	3.29149	5.28949	0.37773	6.46663	0.285714	x	2.82686	1.59996	3.36731	54.3095	0.00163151	36.4793	1.41548
1	Control	168	6.46	4.16112	5.89312	0.293902	7.47039	0.285714
2	Control	168	6.33	2.9488	4.1358	0.287006	7.30008	2.71429
3	Control	168	5.79	3.81172	5.68072	0.329008	2.70104	0.485714
4	Control	168	4.78	1.64026	2.48426	0.339739	2.02181	2.71429	x	8.16997	5.08218	4.00732	30.5416	5.32338	41.4689	5.4067
5	Control	168	5.56	3.48064	5.34264	0.348517	6.13346	0.214286	x	4.79381	4.42477	0.0550096	30.2573	0.00443002	59.1139	1.3508
6	Control	168	5.14	2.91051	4.40451	0.339198	5.23022	1.85714	x	3.91357	3.75163	0.0407993	47.1926	0.00349878	43.8077	1.29017

## Sheet: EXP2
										CHEMTAX
Bottle	Treatment	Time (h)	Sigma	Fo	Fm	Fv/Fm	Chl	Nitrate	HPLC	Prasinophytes	Chlorophytes	Cryptophytes	Diatoms	Dinoflagellates	Haptophytes	Synechococcus
0	Initial	0	6.5	0.710029	1.05363	0.326111	0.861293	7.42857	x	4.78401	19.2438	3.54851	2.19271	5.72843	62.3794	2.12317
0	Initial	0	6.03	0.782956	1.12676	0.305124	0.796389	12	x	4.93725	20.6767	0.0608203	0.502946	6.12962	65.4173	2.27533
0	Initial	0	6.82	0.795135	1.09883	0.276384	0.876161	6.42857	x	4.53875	20.2366	3.34082	0.129613	5.85798	63.6846	2.21166
1	Fe	24	6.35	0.408858	0.673658	0.393078	1.53997	3.28571
2	Fe	24	5.73	0.427236	0.677536	0.369427	1.49448	2
3	Fe	24	6.65	0.434891	0.727391	0.402122	1.54629	2.71429
1	Control	24	5.95	0.517057	0.774557	0.332448	1.00553	7
2	Control	24	5.84	0.428396	0.838696	0.489212	1.36034	7
3	Control	24	6.39	0.531079	0.733679	0.276142	1.51722	3
1	Fe	72	5.24	0.798733	1.28073	0.376347	1.86227	10
2	Fe	72	4.89	0.687384	1.14958	0.402058	1.7957	5
3	Fe	72	4.95	0.88917	1.45047	0.386978	2.27356	5.28571
1	Control	72	4.99	0.660375	1.12577	0.413404	1.6528	9.28571
2	Control	72	4.84	0.749584	1.15018	0.348292	1.43534	8.42857
3	Control	72	5.2	0.816834	1.22593	0.333705	1.4136	11.2857
1	Fe	120	4.68	1.09033	1.79633	0.393024	2.94879	4.71429
2	Fe	120	4.8	1.11031	1.83531	0.395028	2.53528	2.28571
3	Fe	120	4.63	0.884348	1.46835	0.397726	2.21808	5
4	Fe	120	4.61	1.01093	1.63393	0.381288	3.48079		x	3.19657	14.2058	4.83732	32.0134	7.02305	34.9914	3.73246
5	Fe	120	4.38	0.772906	1.27151	0.392134	2.46583		x	2.92547	14.6839	4.40729	34.3127	5.87722	34.2216	3.5717
1	Control	120	4.78	1.04613	1.76813	0.408342	2.78181	4.85714
2	Control	120	5.42	1.25699	1.87599	0.329958	1.81978	5.71429
3	Control	120	5.2	1.07383	1.57983	0.320288	1.45331	2.57143
4	Control	120	4.9	0.950585	1.49558	0.364406	2.10259		x	2.83596	15.1705	3.94362	18.7774	4.67942	51.6344	2.95863
5	Control	120	5.31	1.15781	1.74981	0.338323	1.84208		x	6.87604	24.0133	2.64722	13.2849	5.07567	44.6846	3.41829
1	Fe	168	5.79	1.77174	2.66674	0.335616	4.36704	2.85714
2	Fe	168	8.07	2.2831	3.2221	0.291425	5.23477	1.71429
3	Fe	168	5.7	1.61247	2.58547	0.376334	3.57598	5.42857
6	Fe	168	5.03	1.51462	2.31762	0.346475	3.63711		x	NaN	NaN	NaN	NaN	NaN	NaN	NaN
7	Fe	168	6.39	1.89837	2.79637	0.321131	4.46657		x	2.73443	7.69158	0	49.3529	6.55528	30.2545	3.41128
8	Fe	168	7.04	2.06235	3.11735	0.338428	5.44203		x	1.6445	7.26781	0.138887	36.1886	6.45251	44.949	3.35867
9	Fe	168	5.39	1.61109	2.47109	0.348024	3.91648	2.28571
10	Fe	168	5.79	1.76142	2.63542	0.331635	4.16323	3.71429
11	Fe	168	5.63	1.81043	2.67643	0.323565	3.77391	5.71429
12	Fe	168	5.27	1.46568	2.26968	0.354234	2.94668	5.57143
1	Control	168	5.9	1.73641	2.69141	0.354833	4.07658	3.57143
2	Control	168	6.31	1.69075	2.38175	0.290122	2.11923	3.28571
3	Control	168	6.27	1.51388	2.12888	0.288884	1.81223	3.14286
6	Control	168	6.38	1.93035	2.62235	0.263885	2.79135		x	3.95752	20.2078	0.0670628	14.0455	5.68589	52.2959	3.74029
7	Control	168	5.78	1.67046	2.30146	0.274174	1.94781		x	3.3145	20.1684	3.01164	16.4143	5.71029	47.2091	4.17184
8	Control	168	5.27	1.4496	1.9636	0.261764	1.67277		x	3.7771	23.1899	2.3589	13.4875	6.19681	45.5803	5.40938
9	Control	168	5.79	1.07249	1.42549	0.247634	1.09273	9.14286
10	Control	168	6.25	1.65994	2.26894	0.268407	1.63172	7
11	Control	168	5.6	1.49463	1.97663	0.243849	1.62429	2.85714
12	Control	168	5.95	1.80059	2.56959	0.299269	2.92383	5.85714

## Sheet: EXP3
										CHEMTAX
Bottle	Treatment	Time (h)	Sigma	Fo	Fm	Fv/Fm	Chl	Nitrate	HPLC	Prasinophytes	Chlorophytes	Cryptophytes	Diatoms	Dinoflagellates	Haptophytes	Synechococcus
0	Initial	0	7.93	0.830866	1.12857	0.263786	0.859296	15.8333	x	13.537	22.1732	2.83952	3.95562	9.2765	47.7218	0.496386
0	Initial	0	7.03	0.834958	1.13896	0.266911	0.861293	16.7857	x	14.7973	21.8183	2.33829	3.98158	9.07038	47.669	0.325127
0	Initial	0	6.28	0.82521	1.10551	0.253548	0.990548	16.0714	x	22.73	13.3344	2.74542	0.523279	9.45318	51.2137	0
1	Fe	24	6.39	0.628498	0.865498	0.273831	0.996318	22.5
2	Fe	24	6.07	0.553563	0.828263	0.331658	0.976902	18.3333
3	Fe	24	5.28	0.391944	0.485044	0.191941	0.599455	21.1905
4	Fe	24	5.89	0.568996	0.836896	0.320112	0.899016
5	Fe	24	6.85	0.602273	0.897973	0.329297	0.963921
1	Control	24	5.55	0.602447	0.862647	0.30163	0.866952	10.631
2	Control	24	5.21	0.73396	0.97966	0.250801	0.887255	20.119
3	Control	24	5.62	0.60667	0.83017	0.269222	0.818134	17.0238
4	Control	24	6.04	0.646167	0.888367	0.272635	0.810368
5	Control	24	4.99	0.650434	0.886234	0.26607	0.862403
1	Fe	48	5.56	0.548126	0.804426	0.318612	1.137	15.8333
2	Fe	48	6.09	0.562275	0.837175	0.328366	1.20268	14.7619
3	Fe	48	6.75	0.287137	0.375737	0.235803	0.49361	17.619
6	Fe	48	5.13	0.499041	0.717541	0.304512	1.02239
7	Fe	48	5.36	0.530834	0.806334	0.34167	1.07986
1	Control	48	5.49	0.680317	0.925317	0.264774	0.868616	12.5
2	Control	48	6.13	0.705478	0.947278	0.255258	0.95327	10.7143
3	Control	48	6.15	0.666223	0.859623	0.224982	0.841323	14.881
6	Control	48	5	0.649138	0.878138	0.260779	0.907781
7	Control	48	6.1	0.591237	0.804037	0.264664	0.841323
1	Fe	144	6.01	1.68336	2.47436	0.319678	4.49231	9.83333
2	Fe	144	6.06	1.31495	1.88195	0.301283	2.98629	10.7976
3	Fe	144	5.15	0.316465	0.438165	0.277749	0.873498	10.2857
8	Fe	144	5.71	1.72676	2.50876	0.311707	4.28816
9	Fe	144	5.21	1.26275	1.82775	0.309123	3.24114
10	Fe	144	5.36	1.36782	1.98382	0.310512	3.11188	10.3095	x	6.30075	8.4921	3.15475	44.2633	9.40572	27.7891	0.594354
11	Fe	144	5.61	0.252417	0.304817	0.171907	0.168864	13.6905	x	NaN	NaN	NaN	NaN	NaN	NaN	NaN
12	Fe	144	5.94	0.307966	0.396466	0.223222	0.65859	12.8571	x	4.34954	25.4406	0.491054	52.3284	2.54644	9.43169	5.41229
13	Fe	144	5.36	1.35072	1.97472	0.315995	4.6047
14	Fe	144	5.89	0.271064	0.407864	0.335406	0.523122
15	Fe	144	4.97	0.876287	1.29609	0.323898	3.37971
16	Fe	144	4.92	1.03715	1.47115	0.295006	3.65076
1	Control	144	6.25	1.00776	1.40576	0.283121	1.48671	8.78571
2	Control	144	7.11	1.04295	1.46295	0.287091	1.47672	11.369
3	Control	144	6.2	0.774337	1.09874	0.295248	1.14344	8.04762
8	Control	144	5.34	1.25767	1.88167	0.331621	3.47979
9	Control	144	5.8	1.00675	1.43775	0.299773	1.94781
10	Control	144	5.38	0.760301	1.017	0.252409	0.920096	9.02381	x	14.4759	21.7457	0	13.4182	8.03452	41.8208	0.504875
11	Control	144	6.22	1.09773	1.49673	0.26658	1.60742	13.4524	x	11.1661	23.7278	0	19.7301	1.4709	42.4692	1.43595
12	Control	144	6.52	1.0484	1.4424	0.273156	1.75276	12.381	x	14.7794	13.7048	2.75812	23.8788	8.11449	35.9917	0.772603
13	Control	144	6.33	1.23775	1.69375	0.269225	2.21597
14	Control	144	6.04	0.965263	1.30526	0.260484	1.79015
15	Control	144	6.69	1.07115	1.46215	0.267415	1.7268
16	Control	144	6.02	0.960529	1.28353	0.25165	1.75687

## Sheet: FIG4A
DATE	TIME (GMT)	MLD	Wind Stress
2015-12-04	06:00:00	26.3333	0.00192422
2015-12-04	12:00:00	14.5	0.000587754
2015-12-04	18:00:00	29	0.00452664
2015-12-05	00:00:00	19	0.0158795
2015-12-05	06:00:00	21	0.120333
2015-12-05	12:00:00	24	0.15021
2015-12-05	18:00:00	23	0.0929848
2015-12-06	00:00:00	30	0.0652359
2015-12-06	06:00:00	23.3333	0.113358
2015-12-06	12:00:00	14.5	0.136123
2015-12-06	18:00:00	33	0.0153456
2015-12-07	00:00:00	34	0.112523
2015-12-07	06:00:00	32.7143	0.107658
2015-12-07	12:00:00	25.3333	0.126643
2015-12-07	18:00:00	38.6	0.115652
2015-12-08	00:00:00	37.4444	0.0674683
2015-12-08	06:00:00	32.1	0.189196
2015-12-08	12:00:00	33	0.428181
2015-12-08	18:00:00	41.5	0.254295
2015-12-09	00:00:00	69.6667	0.28162
2015-12-09	06:00:00	34	0.282486
2015-12-09	12:00:00	39.6667	0.513219
2015-12-09	18:00:00	47	0.387817
2015-12-10	00:00:00	44.6667	0.218285
2015-12-10	06:00:00	46	0.126652
2015-12-10	12:00:00	35.6667	0.20433
2015-12-10	18:00:00	36	0.192782
2015-12-11	00:00:00	52.6667	0.142308
2015-12-11	06:00:00	41.6667	0.120331
2015-12-11	12:00:00	33	0.0943509
2015-12-11	18:00:00	23	0.025585
2015-12-12	00:00:00	33	0.0711507
2015-12-12	06:00:00	37	0.173028
2015-12-12	12:00:00	36.6667	0.217602
2015-12-12	18:00:00	32.3333	0.171312
2015-12-13	00:00:00	33	0.12789
2015-12-13	06:00:00	36.25	0.114068
2015-12-13	12:00:00	42.6667	0.133283
2015-12-13	18:00:00	33	0.223069
2015-12-14	00:00:00	19	0.415121
2015-12-14	06:00:00	37.6667	0.222838
2015-12-14	12:00:00	29	0.168102
2015-12-14	18:00:00	26	0.425704
2015-12-15	00:00:00	39.5	0.994938
2015-12-15	06:00:00	64.3333	0.760688
2015-12-15	12:00:00	65.3333	0.524633
2015-12-15	18:00:00	63.3333	0.418898
2015-12-16	00:00:00	66	0.254648
2015-12-16	06:00:00	67	0.321833
2015-12-16	12:00:00	59.3333	0.45254
2015-12-16	18:00:00	68.3333	0.317723
2015-12-17	00:00:00	69	0.384037
2015-12-17	06:00:00	62	0.411237
2015-12-17	12:00:00	55	0.444327
2015-12-17	18:00:00	64	0.319138
2015-12-18	00:00:00	62	0.204208
2015-12-18	06:00:00	63	0.207311
2015-12-18	12:00:00	39	0.164357
2015-12-18	18:00:00	57	0.373955
2015-12-19	00:00:00	63	0.579127
2015-12-19	06:00:00	57	0.460433
2015-12-19	12:00:00	40	0.215952
2015-12-19	18:00:00	34.6667	0.340682
2015-12-20	00:00:00	54	0.723916
2015-12-20	06:00:00	73.5	0.880094
2015-12-20	12:00:00	74.3333	0.943512
2015-12-20	18:00:00	72	0.837218
2015-12-21	00:00:00	93.5	0.60739
2015-12-21	06:00:00	74	0.286082
2015-12-21	12:00:00	84.3333	0.117307
2015-12-21	18:00:00	72.3333	0.312373
2015-12-22	00:00:00	79.5	0.290375
2015-12-22	06:00:00	80.6667	0.1133
2015-12-22	12:00:00	52.6667	0.12973
2015-12-22	18:00:00	40	0.318152
2015-12-23	00:00:00	67.5	0.42883
2015-12-23	06:00:00	62	0.548914
2015-12-23	12:00:00	82.3333	0.744508
2015-12-23	18:00:00	88	0.745293
2015-12-24	00:00:00	106	0.726456
2015-12-24	06:00:00	89	0.474242
2015-12-24	12:00:00	97.6667	0.288189
2015-12-24	18:00:00	97	0.426724
2015-12-25	00:00:00	94.3333	0.50825
2015-12-25	06:00:00	107.5	0.408757
2015-12-25	12:00:00	97.3333	0.394177
2015-12-25	18:00:00	103	0.623062
2015-12-26	00:00:00	91	0.633692
2015-12-26	06:00:00	95.5	0.83465
2015-12-26	12:00:00	92.6667	0.646764
2015-12-26	18:00:00	92.6667	0.665817
2015-12-27	00:00:00	94.3333	0.456839
2015-12-27	06:00:00	94	0.320666
2015-12-27	12:00:00	90.6667	0.263576
2015-12-27	18:00:00	88.5	0.339648
2015-12-28	00:00:00	89	0.399035
2015-12-28	06:00:00	89.3333	0.108972
2015-12-28	12:00:00	85	0.129237
2015-12-28	18:00:00	17	0.299866
2015-12-29	00:00:00	73.6667	0.356611
2015-12-29	06:00:00	62.5	0.289304
2015-12-29	12:00:00	28	0.284356
2015-12-29	18:00:00	31.6667	0.367661
2015-12-30	00:00:00	36.5	0.501759
2015-12-30	06:00:00	38.6667	0.46079
2015-12-30	12:00:00	39	0.211606
2015-12-30	18:00:00	40.3333	0.114747
2015-12-31	00:00:00	49	0.00834948
2015-12-31	06:00:00	54.6667	0.0538113
2015-12-31	12:00:00	21.3333	0.142011
2015-12-31	18:00:00	20.3333	0.045257
2016-01-01	00:00:00	30	0.17673
2016-01-01	06:00:00	18.5	0.267435
2016-01-01	12:00:00	23.6667	0.192442
2016-01-01	18:00:00	27	0.0337544
2016-01-02	00:00:00	23.5	0.066986
2016-01-02	06:00:00	18.3333	0.201361
2016-01-02	12:00:00	39.3333	0.570701
2016-01-02	18:00:00	48.5	0.602457
2016-01-03	00:00:00	59	0.367382
2016-01-03	06:00:00	63.3333	0.123318
2016-01-03	12:00:00	60	0.068304
2016-01-03	18:00:00	44	0.0919245
2016-01-04	00:00:00	56.3333	0.0799931
2016-01-04	06:00:00	66.5	0.0167445
2016-01-04	12:00:00	52.6667	0.028333
2016-01-04	18:00:00	45.6667	0.149875
2016-01-05	00:00:00	19	0.256823
2016-01-05	06:00:00	18.6667	0.24317
2016-01-05	12:00:00	13.6667	0.198235
2016-01-05	18:00:00	17.6667	0.156909
2016-01-06	00:00:00	18.6667	0.128157
2016-01-06	06:00:00	19	0.233388
2016-01-06	12:00:00	30.5	0.261137
2016-01-06	18:00:00	20.3333	0.302516
2016-01-07	00:00:00	44.3333	0.47762
2016-01-07	06:00:00	45.3333	0.27082
2016-01-07	12:00:00	33.3333	0.227695
2016-01-07	18:00:00	29.5	0.293931
2016-01-08	00:00:00	38.3333	0.31932
2016-01-08	06:00:00	42.3333	0.393966
2016-01-08	12:00:00	35.5	0.344637
2016-01-08	18:00:00	40.3333	0.367067
2016-01-09	00:00:00	43.6667	0.344501
2016-01-09	06:00:00	57.5	0.354892
2016-01-09	12:00:00	45.6667	0.302815
2016-01-09	18:00:00	38	0.171533
2016-01-10	00:00:00	31	0.295132
2016-01-10	06:00:00	24	0.227816
2016-01-10	12:00:00	25.5	0.2155
2016-01-10	18:00:00	22	0.222428
2016-01-11	00:00:00	22.6667	0.283423
2016-01-11	06:00:00	29	0.200425
2016-01-11	12:00:00	23.3333	0.0979363
2016-01-11	18:00:00	19.3333	0.0741069
2016-01-12	00:00:00	23	0.0773014
2016-01-12	06:00:00	20.6667	0.0267508
2016-01-12	12:00:00	21	0.0525776
2016-01-12	18:00:00	20.6667	0.106736
2016-01-13	00:00:00	15.6667	0.127528
2016-01-13	06:00:00	14.5	0.111898
2016-01-13	12:00:00	15.6667	0.157481
2016-01-13	18:00:00	14.3333	0.108684
2016-01-14	00:00:00	15	0.122843
2016-01-14	06:00:00	13	0.0304646
2016-01-14	12:00:00	14	0.0150882
2016-01-14	18:00:00	16	0.0553283
2016-01-15	00:00:00	16.6667	0.127616
2016-01-15	06:00:00	16	0.21661
2016-01-15	12:00:00	15.3333	0.215346
2016-01-15	18:00:00	17	0.218477
2016-01-16	00:00:00	14.6667	0.168296
2016-01-16	06:00:00	20.6667	0.0820502
2016-01-16	12:00:00	23	0.087598
2016-01-16	18:00:00	17.5	0.10931
2016-01-17	00:00:00	18	0.151874
2016-01-17	06:00:00	15	0.226627
2016-01-17	12:00:00	14.6667	0.255142
2016-01-17	18:00:00	15	0.119949
2016-01-18	00:00:00	20.6667	0.0860364
2016-01-18	06:00:00	19	0.0406125
2016-01-18	12:00:00	25	0.0239345
2016-01-18	18:00:00	22.3333	0.0213918
2016-01-19	00:00:00	20.6667	0.0353986
2016-01-19	06:00:00	20.6667	0.11387
2016-01-19	12:00:00	16.5	0.209828
2016-01-19	18:00:00	16.3333	0.247392
2016-01-20	00:00:00	13	0.217074
2016-01-20	06:00:00	25	0.147901
2016-01-20	12:00:00	20	0.0638514
2016-01-20	18:00:00	16.5	0.0830297
2016-01-21	00:00:00	14.3333	0.275346
2016-01-21	06:00:00	17	0.296382
2016-01-21	12:00:00	18	0.179531
2016-01-21	18:00:00	14.5	0.17912
2016-01-22	00:00:00	16.6667	0.179887
2016-01-22	06:00:00	18.3333	0.0803478
2016-01-22	12:00:00	15.6667	0.0528928
2016-01-22	18:00:00	18.6667	0.104094
2016-01-23	00:00:00	14	0.139115
2016-01-23	06:00:00	17	0.149791
2016-01-23	12:00:00	14.6667	0.126208
2016-01-23	18:00:00	15	0.18731
2016-01-24	00:00:00	15	0.22071
2016-01-24	06:00:00	22.5	0.309058
2016-01-24	12:00:00	22.3333	0.211487
2016-01-24	18:00:00	22	0.0921903
2016-01-25	00:00:00	24	0.0424822
2016-01-25	06:00:00	22.3333	0.117465
2016-01-25	12:00:00	21	0.303776
2016-01-25	18:00:00	20.6667	0.435116
2016-01-26	00:00:00	25.3333	0.472729
2016-01-26	06:00:00	27.5	0.322624
2016-01-26	12:00:00	25.6667	0.375918
2016-01-26	18:00:00	29	0.446067
2016-01-27	00:00:00	30.6667	0.465357
2016-01-27	06:00:00	39.3333	0.534026
2016-01-27	12:00:00	35.5	0.43538
2016-01-27	18:00:00	30.3333	0.415575
2016-01-28	00:00:00	30.5	0.2974
2016-01-28	06:00:00	33.3333	0.283714
2016-01-28	12:00:00	29.6667	0.402124
2016-01-28	18:00:00	37	0.484339
2016-01-29	00:00:00	32.5	0.501282
2016-01-29	06:00:00	41.6667	0.268426
2016-01-29	12:00:00	36	0.0872236
2016-01-29	18:00:00	35.6667	0.112946
2016-01-30	00:00:00	34	0.135124
2016-01-30	06:00:00	31.6667	0.105945
2016-01-30	12:00:00	34	0.0304901
2016-01-30	18:00:00	31.3333	0.0118839
2016-01-31	00:00:00	32	0.0776353
2016-01-31	06:00:00	24.5	0.12141
2016-01-31	12:00:00	14	0.054831
2016-01-31	18:00:00	14	0.078021
2016-02-01	00:00:00	18	NaN
2016-02-01	06:00:00	32	NaN
2016-02-01	12:00:00	39	NaN
2016-02-01	18:00:00	37.6667	0.363839
2016-02-02	00:00:00	43.6667	0.323585
2016-02-02	06:00:00	42	0.193447
2016-02-02	12:00:00	52.3333	0.137194
2016-02-02	18:00:00	48.6667	0.12131
2016-02-03	00:00:00	49.3333	0.146784
2016-02-03	06:00:00	49	0.134069
2016-02-03	12:00:00	44.3333	0.1402
2016-02-03	18:00:00	40	0.286829
2016-02-04	00:00:00	49	0.509004
2016-02-04	06:00:00	46	0.57101
2016-02-04	12:00:00	54.6667	0.336044
2016-02-04	18:00:00	39.3333	0.323251
2016-02-05	00:00:00	42.5	0.448195
2016-02-05	06:00:00	44	0.415606
2016-02-05	12:00:00	38.3333	0.299788
2016-02-05	18:00:00	40	0.26794
2016-02-06	00:00:00	45.5	0.297042
2016-02-06	06:00:00	47.3333	0.265309
2016-02-06	12:00:00	38	0.20519
2016-02-06	18:00:00	37	0.0631095
2016-02-07	00:00:00	43.5	0.116295
2016-02-07	06:00:00	38.6667	0.121611
2016-02-07	12:00:00	31.6667	0.121768
2016-02-07	18:00:00	18	0.150955
2016-02-08	00:00:00	32.6667	0.0698951
2016-02-08	06:00:00	NaN	0.0400639

## Sheet: FIG4B
DATE	TIME (GMT)	Chl (Euphotic)	Chl (MLD)
2015-07-28	13:59:56	NaN	NaN
2015-07-28	14:08:50	NaN	NaN
2015-07-28	14:24:31	NaN	NaN
2015-07-28	14:40:46	NaN	NaN
2015-07-28	15:06:33	NaN	NaN
2015-07-28	15:38:10	NaN	NaN
2015-07-28	16:08:00	NaN	NaN
2015-07-28	17:11:31	NaN	NaN
2015-07-28	17:50:15	NaN	NaN
2015-07-28	20:28:04	NaN	NaN
2015-07-28	20:59:38	NaN	0.199053
2015-07-29	01:34:12	NaN	0.202071
2015-07-29	01:52:54	NaN	0.202483
2015-07-29	06:29:03	NaN	0.204917
2015-07-29	07:00:50	NaN	0.206444
2015-07-29	11:35:45	NaN	0.206327
2015-07-29	12:07:17	0.218991	0.202291
2015-07-29	16:48:45	0.219634	0.202041
2015-07-29	17:33:28	0.217292	0.198732
2015-07-29	22:02:06	0.214699	0.196077
2015-07-29	22:17:57	0.212106	0.19309
2015-07-30	02:44:29	0.209513	0.193794
2015-07-30	03:14:15	0.207673	0.19061
2015-07-30	07:39:25	0.207876	0.191313
2015-07-30	07:53:28	0.207985	0.192939
2015-07-30	12:19:47	0.208378	0.195262
2015-07-30	12:34:19	0.209053	0.196123
2015-07-30	16:58:14	0.20926	0.19641
2015-07-30	17:10:28	0.207705	0.190987
2015-07-30	21:35:14	0.206528	0.190221
2015-07-30	21:47:51	0.205351	0.188885
2015-07-31	02:08:34	0.204174	0.188706
2015-07-31	02:25:46	0.202997	0.191356
2015-07-31	06:45:20	0.202181	0.193409
2015-07-31	06:58:56	0.201975	0.190165
2015-07-31	11:20:56	0.205767	0.193685
2015-07-31	11:34:39	0.209834	0.194551
2015-07-31	15:53:35	0.214174	0.194863
2015-07-31	16:15:58	0.218427	0.19901
2015-07-31	20:37:53	0.222345	0.206337
2015-07-31	20:56:25	0.222537	0.206799
2015-08-01	01:20:01	0.22273	0.21012
2015-08-01	01:33:44	0.222923	0.212429
2015-08-01	05:50:34	0.223116	0.213767
2015-08-01	06:08:41	0.223556	0.212709
2015-08-01	10:29:40	0.225757	0.215818
2015-08-01	10:58:44	0.226516	0.215145
2015-08-01	15:16:48	0.226842	0.216707
2015-08-01	15:30:20	0.226734	0.217236
2015-08-01	20:01:57	0.225946	0.217421
2015-08-01	20:20:52	0.222964	0.213118
2015-08-02	00:44:28	0.22099	0.21025
2015-08-02	01:01:46	0.219017	0.205776
2015-08-02	05:19:05	0.217043	0.202924
2015-08-02	05:30:57	0.215338	0.19948
2015-08-02	09:58:09	0.218116	0.202068
2015-08-02	10:14:08	0.220086	0.203117
2015-08-02	14:31:12	0.221683	0.203274
2015-08-02	14:47:00	0.222906	0.200567
2015-08-02	19:16:10	0.223487	0.199173
2015-08-02	19:27:42	0.219211	0.193925
2015-08-02	23:53:39	0.215369	0.190997
2015-08-03	00:04:59	0.211527	0.189401
2015-08-03	04:39:26	0.207686	0.189286
2015-08-03	05:00:04	0.204972	0.188966
2015-08-03	09:29:06	0.209809	0.194276
2015-08-03	09:41:16	0.213699	0.196626
2015-08-03	14:02:54	0.218391	0.199666
2015-08-03	14:14:58	0.223884	0.202249
2015-08-03	18:27:51	0.229052	0.204474
2015-08-03	18:40:15	0.22747	0.199835
2015-08-03	22:57:13	0.227637	0.201506
2015-08-03	23:08:38	0.227805	0.200917
2015-08-04	03:28:42	0.227972	0.201723
2015-08-04	03:42:21	0.227915	0.202816
2015-08-04	07:59:18	0.230201	0.208455
2015-08-04	08:20:53	0.233188	0.211138
2015-08-04	12:36:04	0.23641	0.21316
2015-08-04	12:49:27	0.239866	0.21453
2015-08-04	17:00:41	0.243781	0.212868
2015-08-04	17:16:03	0.245586	0.208123
2015-08-04	21:25:59	0.246924	0.20227
2015-08-04	21:41:52	0.248261	0.201713
2015-08-05	01:53:02	0.249599	0.199143
2015-08-05	02:10:43	0.250936	0.203516
2015-08-05	06:26:49	0.252274	0.211821
2015-08-05	06:40:18	0.254228	0.219529
2015-08-05	10:59:55	0.256736	0.227152
2015-08-05	11:17:42	0.257991	0.235284
2015-08-05	15:38:48	0.258486	0.238559
2015-08-05	15:53:49	0.258222	0.235522
2015-08-05	20:06:55	0.256581	0.235724
2015-08-05	20:21:10	0.253627	0.229089
2015-08-05	23:30:45	0.251167	0.226829
2015-08-05	23:42:54	0.248706	0.223612
2015-08-06	02:53:32	0.246246	0.223975
2015-08-06	03:05:06	0.244988	0.221524
2015-08-06	07:26:41	0.253269	0.232158
2015-08-06	07:40:25	0.260317	0.234251
2015-08-06	11:56:55	0.266545	0.244829
2015-08-06	12:10:35	0.27195	0.253199
2015-08-06	16:34:35	0.275332	0.256857
2015-08-06	16:47:32	0.268354	0.25039
2015-08-06	20:59:21	0.261787	0.247602
2015-08-06	21:11:39	0.25522	0.237486
2015-08-07	00:52:11	0.248653	0.230289
2015-08-07	01:10:28	0.242087	0.22598
2015-08-07	04:21:24	0.23552	0.221653
2015-08-07	04:33:06	0.231104	0.219608
2015-08-07	07:46:52	0.230426	0.221431
2015-08-07	07:58:39	0.231881	0.22147
2015-08-07	12:20:13	0.234848	0.225101
2015-08-07	12:34:25	0.239325	0.228943
2015-08-07	16:54:19	0.243163	0.228881
2015-08-07	17:08:18	0.244774	0.233407
2015-08-07	21:20:51	0.245762	0.231499
2015-08-07	21:34:30	0.246751	0.229882
2015-08-08	00:57:55	0.247739	0.228928
2015-08-08	01:11:32	0.248728	0.226611
2015-08-08	04:41:56	0.252491	0.2194
2015-08-08	08:37:00	0.25454	0.221305
2015-08-08	12:00:50	0.257392	0.220637
2015-08-08	12:21:46	0.258414	0.219406
2015-08-08	15:40:06	0.258735	0.22133
2015-08-08	15:57:01	0.255581	0.219051
2015-08-08	19:21:06	0.253441	0.221056
2015-08-08	19:32:23	0.249797	0.222595
2015-08-08	22:52:34	0.247282	0.21921
2015-08-08	23:04:14	0.244767	0.214221
2015-08-09	03:24:49	0.242252	0.214626
2015-08-09	03:37:22	0.240418	0.208471
2015-08-09	08:08:23	0.240861	0.20957
2015-08-09	08:21:30	0.241497	0.216022
2015-08-09	12:51:23	0.245303	0.228176
2015-08-09	13:03:41	0.249117	0.231891
2015-08-09	16:25:42	0.252256	0.23606
2015-08-09	16:36:43	0.253126	0.234153
2015-08-09	21:07:31	0.25381	0.237083
2015-08-09	21:22:17	0.251331	0.236914
2015-08-10	01:51:59	0.248853	0.23892
2015-08-10	02:04:18	0.249762	0.240927
2015-08-10	06:36:58	0.254237	0.246509
2015-08-10	06:51:30	0.258201	0.245315
2015-08-10	11:22:54	0.265769	0.247525
2015-08-10	11:35:24	0.272071	0.251398
2015-08-10	15:55:34	0.276014	0.25353
2015-08-10	16:09:56	0.27742	0.252215
2015-08-10	20:36:48	0.280366	0.253824
2015-08-10	20:48:37	0.280737	0.254097
2015-08-11	00:14:56	0.283403	0.256154
2015-08-11	00:25:56	0.286069	0.257401
2015-08-11	04:50:16	0.288734	0.258366
2015-08-11	05:05:07	0.290073	0.258945
2015-08-11	09:44:25	0.289407	0.258589
2015-08-11	09:56:46	0.288002	0.255127
2015-08-11	14:26:07	0.286453	0.25249
2015-08-11	14:39:38	0.284758	0.250086
2015-08-11	19:10:49	0.284244	0.250803
2015-08-11	19:23:40	0.285591	0.250798
2015-08-11	22:44:31	0.287531	0.251267
2015-08-11	22:55:05	0.28947	0.253963
2015-08-12	02:16:46	0.29141	0.255887
2015-08-12	02:29:33	0.29335	0.253801
2015-08-12	05:52:49	0.295289	0.255569
2015-08-12	06:04:09	0.296365	0.257203
2015-08-12	09:24:59	0.297972	0.260131
2015-08-12	09:43:02	0.299395	0.262435
2015-08-12	13:05:33	0.298871	0.264725
2015-08-12	13:18:13	0.296399	0.268708
2015-08-12	17:35:54	0.292844	0.2688
2015-08-12	17:58:08	0.28681	0.267279
2015-08-12	23:43:40	0.279012	0.258091
2015-08-13	00:12:02	0.271214	0.251482
2015-08-13	05:59:46	0.263416	0.241552
2015-08-13	06:18:20	0.255662	0.236678
2015-08-13	10:44:07	0.249227	0.229164
2015-08-13	11:00:14	0.244441	0.230539
2015-08-13	15:01:10	0.241244	0.231311
2015-08-13	15:25:40	0.239634	0.230465
2015-08-13	21:10:23	0.23957	0.229698
2015-08-13	21:26:35	0.239775	0.23256
2015-08-14	02:56:18	0.239919	0.232678
2015-08-14	03:09:57	0.241194	0.232376
2015-08-14	08:46:54	0.243529	0.233422
2015-08-14	09:04:44	0.245411	0.233544
2015-08-14	13:30:26	0.247344	0.230144
2015-08-14	13:48:51	0.249327	0.230222
2015-08-14	18:01:55	0.250228	0.225512
2015-08-14	18:23:46	0.25012	0.22014
2015-08-14	22:45:38	0.250515	0.217819
2015-08-14	23:03:48	0.250909	0.217134
2015-08-15	03:11:44	0.251304	0.218894
2015-08-15	03:26:08	0.251489	0.222411
2015-08-15	07:41:38	0.249816	0.226873
2015-08-15	07:59:00	0.246968	0.229328
2015-08-15	12:26:41	0.244404	0.235767
2015-08-15	12:48:36	0.242123	0.237081
2015-08-15	17:21:25	0.240336	0.239776
2015-08-15	17:47:37	0.240691	0.240039
2015-08-15	23:37:36	0.242504	0.23721
2015-08-15	23:55:50	0.244317	0.233256
2015-08-16	06:13:21	0.245735	0.228326
2015-08-16	06:30:30	0.248444	0.228307
2015-08-16	12:32:31	0.250048	0.227155
2015-08-16	12:46:07	0.250545	0.229781
2015-08-16	18:42:24	0.249936	0.227432
2015-08-16	18:59:16	0.248615	0.226465
2015-08-16	23:13:49	0.244897	0.221767
2015-08-16	23:40:43	0.241179	0.216316
2015-08-17	04:06:30	0.237461	0.214136
2015-08-17	04:29:53	0.234701	0.213907
2015-08-17	08:40:48	0.233764	0.214211
2015-08-17	08:57:14	0.232892	0.214966
2015-08-17	13:19:24	0.233149	0.217812
2015-08-17	13:38:56	0.234532	0.218964
2015-08-17	19:42:25	0.236086	0.217877
2015-08-17	19:56:55	0.236944	0.218778
2015-08-18	02:00:13	0.238864	0.221672
2015-08-18	02:26:10	0.242045	0.226171
2015-08-18	08:26:24	0.243853	0.218836
2015-08-18	08:39:53	0.246027	0.212739
2015-08-18	13:03:04	0.248089	0.213803
2015-08-18	13:25:07	0.250039	0.210956
2015-08-18	17:39:07	0.250615	0.208995
2015-08-18	17:51:58	0.252453	0.220988
2015-08-18	23:59:27	0.253812	0.227321
2015-08-19	00:12:56	0.25517	0.224481
2015-08-19	06:14:53	0.256529	0.229282
2015-08-19	06:28:42	0.255452	0.229291
2015-08-19	10:56:36	0.254194	0.223157
2015-08-19	15:57:33	0.252754	0.223537
2015-08-19	20:23:43	0.251133	0.221219
2015-08-19	20:37:06	0.249329	0.210767
2015-08-20	00:40:15	0.249778	0.206681
2015-08-20	00:55:52	0.250227	0.205678
2015-08-20	05:23:59	0.250676	0.208327
2015-08-20	05:39:22	0.252678	0.21557
2015-08-20	11:27:32	0.254719	0.229558
2015-08-20	11:43:12	0.256799	0.235732
2015-08-20	18:13:56	0.258916	0.235726
2015-08-20	18:28:14	0.261072	0.231897
2015-08-21	00:24:26	0.261712	0.230638
2015-08-21	00:38:08	0.262353	0.224921
2015-08-21	05:03:13	0.262993	0.224913
2015-08-21	05:16:15	0.265242	0.23007
2015-08-21	11:23:38	0.266617	0.233972
2015-08-21	11:36:38	0.267118	0.235343
2015-08-21	17:49:44	0.266744	0.232068
2015-08-21	18:06:08	0.265496	0.225782
2015-08-22	00:18:39	0.261764	0.223609
2015-08-22	00:32:46	0.260616	0.22331
2015-08-22	06:34:58	0.265943	0.229213
2015-08-22	06:48:13	0.272726	0.235288
2015-08-22	13:02:14	0.279494	0.242739
2015-08-22	13:15:38	0.286249	0.244749
2015-08-22	17:32:28	0.290406	0.248479
2015-08-22	17:44:57	0.288073	0.243522
2015-08-22	22:04:56	0.284271	0.242248
2015-08-22	22:24:09	0.280468	0.239616
2015-08-23	02:49:58	0.276666	0.240437
2015-08-23	03:06:34	0.274215	0.23783
2015-08-23	07:29:42	0.278714	0.242553
2015-08-23	07:47:08	0.284379	0.24436
2015-08-23	13:56:23	0.290419	0.259563
2015-08-23	14:10:34	0.296834	0.266321
2015-08-23	20:15:06	0.302271	0.28302
2015-08-23	20:28:06	0.301133	0.292384
2015-08-24	02:31:55	0.299204	0.299447
2015-08-24	02:44:57	0.297657	0.294221
2015-08-24	07:03:38	0.302909	0.30307
2015-08-24	07:15:20	0.310592	0.306931
2015-08-24	11:32:53	0.315883	0.310508
2015-08-24	11:45:09	0.32142	0.316856
2015-08-24	16:05:00	0.326839	0.318301
2015-08-24	16:16:57	0.325725	0.31491
2015-08-24	20:36:08	0.322445	0.306968
2015-08-24	20:49:33	0.321821	0.297993
2015-08-25	01:11:18	0.321217	0.290703
2015-08-25	01:23:26	0.320613	0.27824
2015-08-25	05:45:03	0.320009	0.280415
2015-08-25	05:56:46	0.319876	0.282083
2015-08-25	10:15:31	0.313397	0.283155
2015-08-25	10:27:58	0.309012	0.291669
2015-08-25	14:44:29	0.304732	0.303359
2015-08-25	14:56:46	0.300559	0.29733
2015-08-25	19:20:01	0.29602	0.298727
2015-08-25	19:32:44	0.297934	0.299521
2015-08-25	23:52:48	0.29786	0.294077
2015-08-26	00:10:54	0.297786	0.294482
2015-08-26	04:32:07	0.297713	0.302146
2015-08-26	04:44:18	0.299738	0.304495
2015-08-26	09:01:12	0.296809	0.303412
2015-08-26	09:13:45	0.290537	0.306552
2015-08-26	13:31:00	0.284769	0.321286
2015-08-26	13:44:41	0.279506	0.319533
2015-08-26	18:01:57	0.272648	0.319794
2015-08-26	18:16:44	0.271249	0.3243
2015-08-26	22:29:44	0.273696	0.330747
2015-08-26	22:46:51	0.276144	0.32763
2015-08-27	05:01:27	0.278592	0.329089
2015-08-27	05:19:09	0.279229	0.319261
2015-08-27	11:28:53	0.291936	0.324246
2015-08-27	11:42:19	0.304427	0.320547
2015-08-27	16:03:21	0.316701	0.328289
2015-08-27	16:25:07	0.328759	0.3385
2015-08-27	20:39:15	0.342411	0.346052
2015-08-27	20:52:57	0.343776	0.345843
2015-08-28	01:16:51	0.343839	0.345401
2015-08-28	06:33:52	0.343374	0.322301
2015-08-28	11:05:23	0.34057	0.306792
2015-08-28	11:24:16	0.335425	0.305479
2015-08-28	17:25:20	0.327939	0.289673
2015-08-28	17:39:01	0.319416	0.287672
2015-08-28	23:40:09	0.30908	0.280039
2015-08-28	23:55:34	0.298743	0.267772
2015-08-29	06:05:31	0.298964	0.260149
2015-08-29	06:19:18	0.299011	0.260703
2015-08-29	10:40:03	0.299287	0.240657
2015-08-29	10:53:11	0.299794	0.236458
2015-08-29	17:14:40	0.300529	0.235817
2015-08-29	17:28:00	0.290938	0.230022
2015-08-29	23:42:36	0.28175	0.225673
2015-08-29	23:57:01	0.27472	0.229452
2015-08-30	06:00:40	0.271452	0.242753
2015-08-30	06:15:51	0.270783	0.251799
2015-08-30	12:24:09	0.271741	0.258438
2015-08-30	12:37:21	0.274328	0.268047
2015-08-30	18:39:53	0.276386	0.269512
2015-08-30	18:53:15	0.27631	0.259115
2015-08-31	00:49:07	0.275263	0.245907
2015-08-31	01:03:24	0.274217	0.230353
2015-08-31	05:23:24	0.27317	0.218266
2015-08-31	05:38:43	0.274676	0.219427
2015-08-31	09:57:02	0.276303	0.222378
2015-08-31	10:09:30	0.277161	0.226411
2015-08-31	16:02:44	0.280012	0.230755
2015-08-31	16:24:00	0.284856	0.229597
2015-08-31	22:28:44	0.289139	0.22667
2015-08-31	22:42:38	0.295295	0.223611
2015-09-01	02:56:49	0.304212	0.235737
2015-09-01	03:18:13	0.310188	0.245334
2015-09-01	07:34:08	0.316569	0.265014
2015-09-01	07:46:32	0.318907	0.280972
2015-09-01	12:04:56	0.319479	0.292971
2015-09-01	12:20:34	0.318285	0.290586
2015-09-01	16:51:48	0.318266	0.288159
2015-09-01	17:06:11	0.316076	0.274723
2015-09-01	21:29:34	0.316163	0.270129
2015-09-01	21:49:51	0.316249	0.267527
2015-09-02	02:03:09	0.316336	0.269686
2015-09-02	02:21:48	0.316067	0.274963
2015-09-02	08:37:37	0.315888	0.284741
2015-09-02	08:51:15	0.317057	0.284548
2015-09-02	15:04:17	0.317847	0.295213
2015-09-02	15:19:03	0.318256	0.30273
2015-09-02	19:45:25	0.31864	0.307515
2015-09-02	20:05:28	0.318555	0.31451
2015-09-03	00:25:30	0.316741	0.31266
2015-09-03	00:38:24	0.314927	0.297733
2015-09-03	05:02:23	0.313113	0.287811
2015-09-03	05:15:26	0.31416	0.281684
2015-09-03	11:21:26	0.313226	0.266051
2015-09-03	11:36:02	0.310309	0.259424
2015-09-03	17:48:29	0.305411	0.257093
2015-09-03	18:04:25	0.29853	0.247298
2015-09-04	00:13:03	0.286806	0.239635
2015-09-04	00:32:08	0.283123	0.242329
2015-09-04	06:49:30	0.284314	0.252028
2015-09-04	11:41:32	0.287366	0.262211
2015-09-04	15:53:10	0.292288	0.276694
2015-09-04	16:06:43	0.299079	0.288469
2015-09-04	22:09:32	0.299699	0.291087
2015-09-04	22:23:24	0.297313	0.291397
2015-09-05	04:31:57	0.294937	0.293344
2015-09-05	04:45:09	0.295277	0.294972
2015-09-05	10:56:33	0.294852	0.29642
2015-09-05	11:10:35	0.29366	0.30129
2015-09-05	17:17:40	0.291701	0.296909
2015-09-05	17:31:36	0.288976	0.291314
2015-09-05	23:37:45	0.282768	0.287953
2015-09-05	23:51:18	0.27656	0.285829
2015-09-06	05:57:34	0.281713	0.277717
2015-09-06	06:10:15	0.289138	0.277262
2015-09-06	12:29:18	0.290914	0.280954
2015-09-06	12:45:38	0.294625	0.283003
2015-09-06	16:58:20	0.300272	0.276914
2015-09-06	17:11:06	0.296493	0.279427
2015-09-06	21:31:24	0.292378	0.279832
2015-09-06	21:48:37	0.295848	0.27539
2015-09-07	03:50:07	0.299318	0.273352
2015-09-07	04:04:17	0.30206	0.280298
2015-09-07	10:19:06	0.299573	0.277889
2015-09-07	10:40:27	0.296337	0.270349
2015-09-07	14:57:08	0.292354	0.265675
2015-09-07	19:50:04	0.287623	0.26264
2015-09-08	02:08:35	0.282871	0.259027
2015-09-08	02:30:12	0.278557	0.263723
2015-09-08	08:43:54	0.277365	0.270065
2015-09-08	09:04:28	0.278293	0.277742
2015-09-08	14:23:52	0.27875	0.272651
2015-09-08	14:38:31	0.278737	0.267917
2015-09-08	19:05:13	0.282297	0.25943
2015-09-08	19:19:07	0.282265	0.258618
2015-09-08	23:55:22	0.279644	0.250026
2015-09-09	00:10:08	0.277022	0.24931
2015-09-09	04:32:23	0.274401	0.249827
2015-09-09	04:45:49	0.270832	0.251169
2015-09-09	09:27:52	0.269868	0.249014
2015-09-09	09:43:01	0.268367	0.252836
2015-09-09	14:24:41	0.266456	0.251859
2015-09-09	14:40:41	0.264134	0.250156
2015-09-09	20:35:43	0.26235	0.241317
2015-09-09	20:49:42	0.25755	0.236735
2015-09-10	02:42:07	0.254962	0.23202
2015-09-10	09:11:13	0.254082	0.230848
2015-09-10	15:20:13	0.253128	0.22034
2015-09-10	15:34:19	0.252101	0.216616
2015-09-10	21:09:59	0.250999	0.21231
2015-09-10	21:23:26	0.247737	0.204789
2015-09-11	01:45:49	0.242693	0.200735
2015-09-11	01:58:30	0.238017	0.204238
2015-09-11	06:17:54	0.233433	0.208025
2015-09-11	06:31:01	0.231068	0.20982
2015-09-11	12:47:54	0.229317	0.216507
2015-09-11	13:07:45	0.228182	0.218036
2015-09-11	19:16:40	0.227293	0.21821
2015-09-11	19:36:39	0.226927	0.219145
2015-09-12	01:43:41	0.224957	0.216211
2015-09-12	02:04:14	0.224812	0.212191
2015-09-12	08:17:25	0.229855	0.211955
2015-09-12	08:31:58	0.237144	0.214919
2015-09-12	14:42:33	0.244159	0.213455
2015-09-12	15:01:36	0.250898	0.216621
2015-09-12	21:15:35	0.255538	0.211642
2015-09-12	21:29:45	0.254714	0.204276
2015-09-13	02:46:26	0.251368	0.201998
2015-09-13	02:59:04	0.249549	0.201783
2015-09-13	07:19:27	0.246345	0.204596
2015-09-13	07:31:25	0.245986	0.216621
2015-09-13	11:55:35	0.246822	0.229151
2015-09-13	12:10:51	0.248852	0.236823
2015-09-13	18:20:50	0.25055	0.244166
2015-09-13	18:34:40	0.254828	0.245368
2015-09-14	00:46:09	0.257455	0.24174
2015-09-14	01:04:53	0.260082	0.238422
2015-09-14	05:19:08	0.262708	0.237917
2015-09-14	05:34:24	0.267144	0.241885
2015-09-14	09:54:49	0.272713	0.244367
2015-09-14	10:07:46	0.281026	0.250209
2015-09-14	16:20:17	0.286787	0.251045
2015-09-14	16:34:26	0.289996	0.243979
2015-09-14	22:37:15	0.288844	0.231373
2015-09-14	22:51:19	0.284006	0.217497
2015-09-15	04:55:06	0.273871	0.210233
2015-09-15	05:11:32	0.268484	0.217481
2015-09-15	09:24:47	0.26383	0.219011
2015-09-15	16:03:06	0.259908	0.232917
2015-09-15	22:13:50	0.256719	0.240699
2015-09-15	22:31:42	0.254261	0.234853
2015-09-16	04:41:42	0.247787	0.228607
2015-09-16	04:58:48	0.244191	0.232486
2015-09-16	11:05:01	0.241901	0.226577
2015-09-16	11:19:36	0.240918	0.230715
2015-09-16	17:23:34	0.241241	0.234987
2015-09-16	17:45:26	0.242871	0.228683
2015-09-16	23:57:05	0.24293	0.223631
2015-09-17	00:10:35	0.242989	0.220925
2015-09-17	05:05:53	0.243048	0.219596
2015-09-17	05:18:29	0.242948	0.222558
2015-09-17	09:39:58	0.241847	0.223382
2015-09-17	09:52:35	0.242513	0.224582
2015-09-17	14:11:34	0.244946	0.223678
2015-09-17	20:58:21	0.249146	0.219194
2015-09-18	02:57:19	0.255272	0.22292
2015-09-18	03:11:17	0.26296	0.234832
2015-09-18	09:17:58	0.276451	0.252915
2015-09-18	09:32:24	0.287963	0.266471
2015-09-18	15:32:44	0.296372	0.284059
2015-09-18	15:46:34	0.301679	0.298332
2015-09-18	21:57:45	0.305088	0.28099
2015-09-18	22:13:21	0.299592	0.257663
2015-09-19	04:21:43	0.292972	0.251554
2015-09-19	04:39:26	0.286011	0.249188
2015-09-19	10:51:11	0.280204	0.239447
2015-09-19	11:05:41	0.275553	0.244057
2015-09-19	17:05:39	0.272057	0.262584
2015-09-19	17:20:31	0.269715	0.268012
2015-09-19	21:43:51	0.26887	0.265566
2015-09-19	21:58:42	0.268024	0.265459
2015-09-20	02:09:44	0.267179	0.27641
2015-09-20	02:24:04	0.265703	0.269176
2015-09-20	06:41:56	0.263863	0.261511
2015-09-20	06:58:37	0.261082	0.260282
2015-09-20	11:21:45	0.259436	0.268353
2015-09-20	11:39:27	0.258923	0.280155
2015-09-20	17:47:37	0.260173	0.276471
2015-09-20	18:06:41	0.262922	0.275916
2015-09-21	00:16:39	0.267744	0.272942
2015-09-21	00:34:55	0.272567	0.264868
2015-09-21	04:52:42	0.277389	0.253465
2015-09-21	05:05:28	0.281242	0.256419
2015-09-21	09:26:36	0.283209	0.26662
2015-09-21	09:42:30	0.284184	0.275522
2015-09-21	13:56:11	0.284953	0.277529
2015-09-21	14:08:54	0.285517	0.280421
2015-09-21	18:19:19	0.286845	0.28904
2015-09-21	18:32:06	0.289854	0.288503
2015-09-21	22:46:11	0.293649	0.283687
2015-09-21	22:59:06	0.297445	0.282268
2015-09-22	03:11:18	0.30124	0.28336
2015-09-22	03:28:31	0.303356	0.282666
2015-09-22	07:54:57	0.301856	0.283568
2015-09-22	08:08:11	0.302725	0.290884
2015-09-22	12:20:27	0.2981	0.299324
2015-09-22	12:33:28	0.294069	0.302191
2015-09-22	16:58:57	0.292312	0.305344
2015-09-22	17:11:53	0.294765	0.306962
2015-09-22	21:26:29	0.295445	0.305273
2015-09-23	02:21:24	0.29744	0.296367
2015-09-23	07:04:44	0.29858	0.290772
2015-09-23	12:13:10	0.297989	0.282938
2015-09-23	16:35:12	0.295696	0.276649
2015-09-23	16:52:07	0.291701	0.272041
2015-09-23	23:04:40	0.290775	0.273223
2015-09-23	23:20:27	0.288673	0.273192
2015-09-24	05:32:19	0.288172	0.273357
2015-09-24	05:47:25	0.288321	0.27363
2015-09-24	10:33:30	0.29554	0.280395
2015-09-24	10:47:26	0.299899	0.284066
2015-09-24	15:14:35	0.3042	0.278532
2015-09-24	15:29:30	0.306541	0.278008
2015-09-24	19:48:50	0.307843	0.279874
2015-09-24	20:05:37	0.301687	0.276062
2015-09-25	02:06:36	0.298003	0.269714
2015-09-25	02:22:13	0.295374	0.27153
2015-09-25	08:39:27	0.291943	0.270119
2015-09-25	08:54:44	0.289437	0.266146
2015-09-25	15:04:41	0.286367	0.253933
2015-09-25	15:18:21	0.282733	0.247379
2015-09-25	21:41:31	0.277481	0.242399
2015-09-25	22:02:29	0.272465	0.236804
2015-09-26	03:11:18	0.265962	0.23001
2015-09-26	03:24:01	0.260563	0.226145
2015-09-26	07:51:56	0.257768	0.22943
2015-09-26	08:04:32	0.257421	0.232073
2015-09-26	14:19:09	0.258671	0.245996
2015-09-26	14:33:21	0.261517	0.260593
2015-09-26	20:41:15	0.264854	0.265919
2015-09-26	20:55:23	0.267184	0.265234
2015-09-27	03:10:05	0.268661	0.271195
2015-09-27	03:23:07	0.274806	0.269814
2015-09-27	09:31:18	0.278885	0.25674
2015-09-27	16:13:05	0.2809	0.258385
2015-09-27	22:29:57	0.280851	0.257244
2015-09-27	22:48:12	0.278736	0.254849
2015-09-28	03:09:13	0.270465	0.245193
2015-09-28	08:16:35	0.26285	0.245269
2015-09-28	14:20:45	0.256348	0.242274
2015-09-28	14:51:52	0.250958	0.242321
2015-09-28	21:04:38	0.24668	0.236407
2015-09-28	21:26:35	0.24294	0.231961
2015-09-29	01:56:27	0.239656	0.227569
2015-09-29	02:21:44	0.239555	0.227243
2015-09-29	06:51:56	0.238128	0.224553
2015-09-29	11:44:11	0.239678	0.221913
2015-09-29	16:20:38	0.242271	0.218278
2015-09-29	16:34:44	0.245908	0.21647
2015-09-29	21:01:34	0.247406	0.210744
2015-09-29	21:31:15	0.251275	0.207289
2015-09-30	01:54:00	0.25321	0.208474
2015-09-30	02:07:14	0.255958	0.214349
2015-09-30	06:33:02	0.259327	0.216374
2015-09-30	06:46:00	0.262573	0.22173
2015-09-30	11:13:57	0.269068	0.232034
2015-09-30	11:28:36	0.274594	0.238526
2015-09-30	15:42:27	0.27688	0.238548
2015-09-30	15:56:06	0.276118	0.242953
2015-09-30	20:15:20	0.273052	0.245075
2015-09-30	20:29:23	0.264311	0.240467
2015-10-01	02:42:29	0.26024	0.240094
2015-10-01	09:53:45	0.258538	0.243675
2015-10-01	14:59:36	0.258439	0.241826
2015-10-01	15:14:48	0.259944	0.243042
2015-10-01	19:31:02	0.263052	0.242738
2015-10-01	19:45:32	0.261636	0.240168
2015-10-02	00:12:31	0.259455	0.233999
2015-10-02	00:26:09	0.257876	0.235106
2015-10-02	06:33:24	0.255147	0.229078
2015-10-02	06:48:14	0.253439	0.227612
2015-10-02	13:07:30	0.251753	0.222509
2015-10-02	13:23:14	0.250089	0.223073
2015-10-02	19:34:44	0.247844	0.217015
2015-10-02	19:52:09	0.246772	0.212734
2015-10-03	01:58:44	0.244701	0.208722
2015-10-03	02:16:18	0.241159	0.203786
2015-10-03	07:22:33	0.24012	0.20009
2015-10-03	07:35:57	0.240104	0.202327
2015-10-03	11:57:48	0.240692	0.206039
2015-10-03	12:11:16	0.241883	0.208774
2015-10-03	18:26:51	0.245148	0.21207
2015-10-03	18:41:14	0.246513	0.213099
2015-10-04	01:00:51	0.247459	0.21586
2015-10-04	01:14:15	0.251363	0.222663
2015-10-04	07:37:56	0.261343	0.238699
2015-10-04	07:53:46	0.270739	0.256723
2015-10-04	14:01:26	0.279415	0.261649
2015-10-04	14:17:00	0.28737	0.26289
2015-10-04	20:27:22	0.291645	0.263375
2015-10-04	20:42:23	0.289125	0.255281
2015-10-05	02:53:47	0.286468	0.248747
2015-10-05	03:08:36	0.286384	0.255144
2015-10-05	09:26:11	0.287877	0.266749
2015-10-05	09:46:12	0.29134	0.275482
2015-10-05	16:05:02	0.294271	0.277851
2015-10-05	16:23:57	0.29667	0.281373
2015-10-05	21:32:00	0.295964	0.283725
2015-10-05	21:50:14	0.29315	0.281701
2015-10-06	02:18:03	0.287834	0.275531
2015-10-06	02:33:01	0.285392	0.27324
2015-10-06	06:44:43	0.28098	0.266431
2015-10-06	07:05:31	0.278166	0.260054
2015-10-06	11:31:58	0.282217	0.254331
2015-10-06	11:46:44	0.287897	0.254569
2015-10-06	16:06:51	0.291546	0.253088
2015-10-06	16:23:13	0.298008	0.25367
2015-10-06	20:44:02	0.303716	0.251885
2015-10-06	20:57:51	0.303403	0.248754
2015-10-07	03:00:02	0.302304	0.246716
2015-10-07	03:15:29	0.300407	0.245892
2015-10-07	09:35:35	0.304217	0.248811
2015-10-07	09:49:18	0.307917	0.259447
2015-10-07	14:30:18	0.311103	0.265239
2015-10-07	14:43:48	0.313776	0.266713
2015-10-07	19:09:55	0.316734	0.266356
2015-10-07	19:24:38	0.31347	0.260168
2015-10-08	01:27:35	0.309802	0.252382
2015-10-08	01:42:36	0.306754	0.246819
2015-10-08	07:57:36	0.306955	0.241772
2015-10-08	08:18:25	0.306674	0.243207
2015-10-08	13:33:23	0.306581	0.242608
2015-10-08	13:50:08	0.306674	0.240208
2015-10-08	18:06:26	0.306335	0.244772
2015-10-08	18:22:55	0.302934	0.256692
2015-10-08	22:48:48	0.300203	0.261897
2015-10-08	23:02:20	0.295511	0.269356
2015-10-09	05:17:17	0.296104	0.274065
2015-10-09	05:31:27	0.295995	0.281293
2015-10-09	11:46:00	0.295183	0.274192
2015-10-09	18:38:06	0.29367	0.267875
2015-10-10	00:11:21	0.293414	0.26176
2015-10-10	00:24:44	0.28717	0.25791
2015-10-10	04:47:59	0.284952	0.254163
2015-10-10	05:00:34	0.28493	0.260143
2015-10-10	09:19:02	0.286156	0.262457
2015-10-10	09:32:33	0.28678	0.271338
2015-10-10	15:45:47	0.288844	0.280722
2015-10-10	16:00:48	0.288321	0.28358
2015-10-10	22:08:09	0.287041	0.27346
2015-10-10	22:27:30	0.285952	0.265308
2015-10-11	04:35:56	0.286903	0.260091
2015-10-11	04:51:26	0.288933	0.253872
2015-10-11	10:56:52	0.296411	0.256687
2015-10-11	11:11:59	0.30244	0.271671
2015-10-11	17:13:51	0.304139	0.280608
2015-10-11	17:29:43	0.301508	0.281612
2015-10-11	23:38:12	0.293468	0.265108
2015-10-11	23:52:40	0.275652	0.2392
2015-10-12	04:13:01	0.254955	0.21943
2015-10-12	04:30:00	0.240227	0.211001
2015-10-12	08:46:50	0.232609	0.204237
2015-10-12	09:00:43	0.229099	0.214878
2015-10-12	13:24:38	0.229948	0.227585
2015-10-12	13:38:29	0.235158	0.229347
2015-10-12	19:50:47	0.238757	0.226893
2015-10-12	20:05:59	0.239607	0.221843
2015-10-13	02:07:15	0.240708	0.218729
2015-10-13	02:25:00	0.243649	0.214348
2015-10-13	06:47:24	0.248592	0.217465
2015-10-13	07:01:41	0.254661	0.223366
2015-10-13	11:27:32	0.262549	0.235722
2015-10-13	11:48:15	0.271276	0.243845
2015-10-13	15:59:59	0.276967	0.243488
2015-10-13	16:14:13	0.279463	0.242213
2015-10-13	20:39:55	0.279639	0.246717
2015-10-13	20:53:55	0.276802	0.240162
2015-10-14	01:18:33	0.278558	0.247201
2015-10-14	06:12:37	0.281785	0.262906
2015-10-14	10:41:51	0.287205	0.274714
2015-10-14	10:58:03	0.29421	0.280803
2015-10-14	15:19:50	0.30028	0.296587
2015-10-14	15:33:24	0.298791	0.30095
2015-10-14	20:02:50	0.294895	0.286661
2015-10-14	20:17:28	0.287871	0.267855
2015-10-15	00:49:30	0.278328	0.261188
2015-10-15	01:02:42	0.262195	0.242168
2015-10-15	05:22:04	0.264151	0.233879
2015-10-15	05:35:19	0.268046	0.238873
2015-10-15	10:03:40	0.27936	0.263029
2015-10-15	10:23:28	0.293814	0.271892
2015-10-15	14:46:59	0.315776	0.287698
2015-10-15	15:00:14	0.320566	0.294911
2015-10-15	21:09:16	0.324335	0.302374
2015-10-15	21:24:30	0.321601	0.300425
2015-10-16	03:44:46	0.316646	0.305139
2015-10-16	04:00:05	0.310601	0.310611
2015-10-16	09:57:07	0.307485	0.314292
2015-10-16	10:12:16	0.305483	0.323025
2015-10-16	14:33:25	0.305741	0.328434
2015-10-16	14:47:02	0.30826	0.333823
2015-10-16	19:20:27	0.314129	0.337818
2015-10-16	19:36:09	0.319329	0.343006
2015-10-17	00:12:36	0.325677	0.349541
2015-10-17	00:28:03	0.327671	0.356248
2015-10-17	05:13:21	0.336288	0.358857
2015-10-17	05:30:00	0.341719	0.357116
2015-10-17	11:44:24	0.343967	0.34649
2015-10-17	18:16:47	0.34303	0.329732
2015-10-18	00:31:00	0.343262	0.316608
2015-10-18	00:47:16	0.33494	0.303231
2015-10-18	06:06:35	0.332392	0.299357
2015-10-18	06:20:58	0.329532	0.301381
2015-10-18	10:52:04	0.332909	0.310715
2015-10-18	11:21:36	0.336345	0.316285
2015-10-18	15:47:03	0.340961	0.312225
2015-10-18	16:01:57	0.342234	0.299616
2015-10-18	21:58:42	0.346252	0.295111
2015-10-19	04:42:34	0.343446	0.284818
2015-10-19	11:02:02	0.341268	0.291074
2015-10-19	11:24:39	0.337344	0.30949
2015-10-19	17:39:42	0.331675	0.322181
2015-10-19	17:59:16	0.324259	0.326071
2015-10-20	00:15:27	0.318115	0.330459
2015-10-20	00:30:11	0.314492	0.318915
2015-10-20	06:40:42	0.313634	0.314037
2015-10-20	06:55:12	0.319739	0.320845
2015-10-20	13:16:43	0.32456	0.330925
2015-10-20	13:31:27	0.328098	0.341204
2015-10-20	19:33:31	0.327831	0.342364
2015-10-20	19:52:29	0.323516	0.337322
2015-10-21	02:02:32	0.310955	0.324951
2015-10-21	02:18:29	0.294475	0.301454
2015-10-21	07:48:09	0.287683	0.291985
2015-10-21	08:01:41	0.286834	0.290219
2015-10-21	12:17:55	0.289952	0.298198
2015-10-21	12:31:16	0.295133	0.312817
2015-10-21	16:54:51	0.30627	0.318761
2015-10-21	17:08:00	0.309757	0.311043
2015-10-21	21:28:45	0.309336	0.303867
2015-10-21	21:42:21	0.306984	0.287594
2015-10-22	03:51:37	0.304606	0.275217
2015-10-22	04:06:36	0.305285	0.280935
2015-10-22	10:26:06	0.312318	0.290956
2015-10-22	10:42:09	0.315254	0.299646
2015-10-22	16:46:50	0.31811	0.306478
2015-10-22	17:02:02	0.320887	0.308614
2015-10-22	21:11:35	0.320528	0.312442
2015-10-22	21:24:45	0.313735	0.311834
2015-10-23	01:47:24	0.310961	0.309466
2015-10-23	02:02:37	0.308058	0.305886
2015-10-23	06:24:03	0.307944	0.301889
2015-10-23	06:37:15	0.310151	0.302586
2015-10-23	10:57:21	0.321162	0.29752
2015-10-23	11:15:35	0.332542	0.297433
2015-10-23	15:34:04	0.345857	0.313784
2015-10-23	15:47:51	0.358191	0.332031
2015-10-23	20:19:54	0.370012	0.341196
2015-10-23	20:34:01	0.374835	0.357048
2015-10-24	02:49:21	0.381098	0.378193
2015-10-24	03:03:48	0.387836	0.383798
2015-10-24	09:17:49	0.39184	0.387102
2015-10-24	09:32:20	0.395703	0.393787
2015-10-24	13:53:57	0.396149	0.398208
2015-10-24	14:08:30	0.393179	0.399243
2015-10-24	18:32:29	0.386317	0.39417
2015-10-24	18:45:16	0.378773	0.389821
2015-10-24	23:11:22	0.367953	0.380504
2015-10-24	23:25:21	0.357133	0.371305
2015-10-25	03:49:49	0.346313	0.360715
2015-10-25	04:09:07	0.339979	0.355444
2015-10-25	08:29:16	0.332705	0.350747
2015-10-25	08:42:13	0.316253	0.351018
2015-10-25	13:11:26	0.304203	0.345949
2015-10-25	13:25:50	0.296555	0.335437
2015-10-25	18:02:06	0.288823	0.342446
2015-10-25	18:21:31	0.286433	0.35074
2015-10-25	23:06:16	0.297622	0.347305
2015-10-25	23:19:53	0.308812	0.350542
2015-10-26	03:46:10	0.320001	0.358561
2015-10-26	04:00:15	0.330219	0.357311
2015-10-26	08:22:07	0.339466	0.359345
2015-10-26	18:34:57	0.34774	0.371525
2015-10-27	00:45:40	0.355044	0.377
2015-10-27	01:01:40	0.361307	0.384288
2015-10-27	07:16:36	0.3666	0.382561
2015-10-27	07:32:29	0.372835	0.379118
2015-10-27	13:46:38	0.37767	0.370111
2015-10-27	14:01:37	0.381103	0.367241
2015-10-27	20:15:22	0.383203	0.360284
2015-10-27	20:30:13	0.384873	0.353181
2015-10-28	02:35:19	0.384199	0.35092
2015-10-28	02:49:42	0.390066	0.357162
2015-10-28	08:56:37	0.394172	0.369324
2015-10-28	15:08:51	0.396516	0.381067
2015-10-28	20:48:32	0.397099	0.390395
2015-10-28	21:03:11	0.395921	0.393096
2015-10-29	01:54:13	0.386439	0.389021
2015-10-29	02:08:46	0.378729	0.384502
2015-10-29	06:56:54	0.37754	0.381859
2015-10-29	07:13:37	0.373241	0.377109
2015-10-29	11:41:08	0.370665	0.373944
2015-10-29	16:32:37	0.369811	0.374117
2015-10-29	21:02:48	0.368908	0.364621
2015-10-29	21:16:32	0.363206	0.354508
2015-10-30	01:41:53	0.362335	0.354183
2015-10-30	01:55:19	0.361455	0.352005
2015-10-30	06:20:13	0.364105	0.349585
2015-10-30	06:33:58	0.365983	0.355539
2015-10-30	10:48:53	0.368882	0.351382
2015-10-30	11:02:57	0.375332	0.341546
2015-10-30	15:32:10	0.380066	0.325632
2015-10-30	15:48:12	0.379544	0.311931
2015-10-30	19:58:40	0.378069	0.308658
2015-10-30	20:12:25	0.373847	0.313637
2015-10-31	00:39:08	0.364348	0.32115
2015-10-31	00:52:55	0.357366	0.334111
2015-10-31	05:23:55	0.357987	0.346482
2015-10-31	05:37:24	0.36141	0.345943
2015-10-31	10:09:38	0.376559	0.353072
2015-10-31	10:23:09	0.382909	0.35385
2015-10-31	15:12:50	0.386267	0.364225
2015-10-31	15:26:53	0.381545	0.372705
2015-10-31	19:44:48	0.373545	0.371326
2015-10-31	19:58:38	0.353344	0.363003
2015-11-01	00:39:45	0.341467	0.367617
2015-11-01	01:01:22	0.343127	0.362195
2015-11-01	06:43:24	0.312783	0.345794
2015-11-01	06:58:13	0.279903	0.33913
2015-11-01	13:06:04	0.256517	0.342294
2015-11-01	13:20:11	0.242626	0.337855
2015-11-01	19:22:52	0.22469	0.339958
2015-11-01	19:37:45	0.248254	0.35568
2015-11-02	01:34:05	0.283848	0.362581
2015-11-02	01:48:53	0.316115	0.363444
2015-11-02	07:53:59	0.345484	0.370901
2015-11-02	08:13:00	0.36855	0.367864
2015-11-02	14:09:11	0.386393	0.378167
2015-11-02	14:29:22	0.399014	0.398165
2015-11-02	20:34:19	0.40974	0.411839
2015-11-02	20:49:54	0.41814	0.418273
2015-11-03	02:59:47	0.427623	0.435496
2015-11-03	03:14:37	0.436351	0.439035
2015-11-03	09:11:27	0.441596	0.447426
2015-11-03	09:25:18	0.43808	0.461657
2015-11-03	15:28:25	0.435548	0.48127
2015-11-03	15:42:33	0.434001	0.496748
2015-11-03	21:58:31	0.434191	0.484719
2015-11-03	22:12:26	0.43885	0.479558
2015-11-04	03:37:40	0.449829	0.471109
2015-11-04	08:52:51	0.456592	0.458127
2015-11-04	13:35:40	0.459131	0.429351
2015-11-04	13:49:52	0.457448	0.421621
2015-11-04	18:23:27	0.451541	0.405813
2015-11-04	18:37:21	0.444837	0.391705
2015-11-04	23:14:19	0.438125	0.374272
2015-11-04	23:28:27	0.431414	0.371609
2015-11-05	03:53:10	0.424702	0.375948
2015-11-05	04:06:12	0.421392	0.372656
2015-11-05	08:33:35	0.427063	0.369137
2015-11-05	08:46:34	0.436023	0.375789
2015-11-05	13:16:10	0.444914	0.356016
2015-11-05	13:30:34	0.453736	0.334289
2015-11-05	18:06:51	0.459087	0.319938
2015-11-05	18:20:49	0.455387	0.305994
2015-11-05	22:57:00	0.448329	0.305711
2015-11-05	23:10:22	0.44127	0.313341
2015-11-06	03:55:15	0.434212	0.317113
2015-11-06	04:08:44	0.431326	0.314428
2015-11-06	08:39:41	0.435558	0.308717
2015-11-06	08:53:01	0.440284	0.283789
2015-11-06	13:26:15	0.445631	0.277188
2015-11-06	13:39:26	0.451598	0.273104
2015-11-06	18:09:04	0.454013	0.273214
2015-11-06	18:27:14	0.449931	0.276729
2015-11-06	23:04:23	0.445975	0.285633
2015-11-06	23:20:42	0.44202	0.29464
2015-11-07	03:53:03	0.438064	0.303601
2015-11-07	04:06:47	0.434602	0.30947
2015-11-07	08:30:44	0.427179	0.328124
2015-11-07	08:49:42	0.419928	0.33906
2015-11-07	13:26:28	0.415193	0.3658
2015-11-07	13:41:10	0.412973	0.391728
2015-11-07	18:25:52	0.412773	0.42546
2015-11-07	18:42:16	0.419051	0.441464
2015-11-08	00:17:28	0.427671	0.455218
2015-11-08	00:32:45	0.433843	0.44966
2015-11-08	05:42:00	0.411698	0.446326
2015-11-08	06:04:00	0.388704	0.437321
2015-11-08	10:55:05	0.394938	0.429783
2015-11-08	11:08:52	0.399624	0.4301
2015-11-08	16:54:25	0.399732	0.420424
2015-11-08	17:08:15	0.421131	0.412177
2015-11-08	22:00:38	0.436354	0.409743
2015-11-08	22:14:42	0.415324	0.405044
2015-11-09	03:09:30	0.388816	0.395581
2015-11-09	03:34:25	0.383112	0.401666
2015-11-09	09:30:41	0.387921	0.407627
2015-11-09	09:45:02	0.401558	0.412613
2015-11-09	15:54:34	0.42081	0.421075
2015-11-09	16:18:26	0.445678	0.430403
2015-11-09	22:16:23	0.455359	0.436484
2015-11-09	22:31:01	0.450161	0.441631
2015-11-10	04:42:08	0.444874	0.439769
2015-11-10	11:33:53	0.429345	0.437444
2015-11-10	17:39:42	0.415924	0.437532
2015-11-10	17:55:09	0.404614	0.438209
2015-11-11	00:05:57	0.405394	0.437836
2015-11-11	00:23:50	0.401875	0.439341
2015-11-11	06:37:35	0.414539	0.443247
2015-11-11	06:52:50	0.425911	0.44479
2015-11-11	12:51:47	0.460123	0.454712
2015-11-11	13:06:30	0.517173	0.445555
2015-11-11	19:20:03	0.60035	0.535664
2015-11-12	02:14:21	0.608092	0.542797
2015-11-12	08:25:17	0.610001	0.539455
2015-11-12	08:40:35	0.583324	0.526068
2015-11-12	14:36:54	0.529946	0.536824
2015-11-12	14:52:01	0.449868	0.448758
2015-11-12	20:53:04	0.437531	0.43189
2015-11-12	21:13:13	0.428457	0.431441
2015-11-13	03:14:10	0.426035	0.42664
2015-11-13	10:08:19	0.427731	0.4203
2015-11-13	16:18:04	0.426564	0.415999
2015-11-13	16:33:26	0.422533	0.423972
2015-11-13	22:42:08	0.41564	0.409437
2015-11-13	22:57:35	0.406527	0.399465
2015-11-14	05:03:17	0.394327	0.383949
2015-11-14	05:19:53	0.384429	0.364171
2015-11-14	11:26:46	0.381225	0.355596
2015-11-14	11:42:04	0.385353	0.364761
2015-11-14	17:49:06	0.394269	0.379866
2015-11-14	18:04:40	0.409492	0.397555
2015-11-15	00:13:24	0.432613	0.424828
2015-11-15	00:28:04	0.453808	0.437831
2015-11-15	06:28:51	0.477927	0.461079
2015-11-15	06:43:36	0.496884	0.48155
2015-11-15	12:39:24	0.508643	0.504882
2015-11-15	12:54:00	0.513203	0.525732
2015-11-15	18:58:10	0.515998	0.52393
2015-11-15	19:13:59	0.51154	0.515051
2015-11-16	01:29:54	0.494166	0.490304
2015-11-16	08:19:30	0.477394	0.461031
2015-11-16	14:11:47	0.461223	0.433458
2015-11-16	20:56:10	0.445654	0.430215
2015-11-17	02:52:47	0.430687	0.413578
2015-11-17	03:08:56	0.428581	0.410626
2015-11-17	09:16:30	0.432473	0.422552
2015-11-17	09:32:07	0.436193	0.425774
2015-11-17	15:38:22	0.437489	0.420279
2015-11-17	15:53:12	0.436362	0.423523
2015-11-17	22:02:29	0.43143	0.421618
2015-11-17	22:17:14	0.425687	0.407652
2015-11-18	04:23:10	0.421671	0.390898
2015-11-18	04:46:40	0.422763	0.382545
2015-11-18	10:52:26	0.425728	0.394396
2015-11-18	11:08:55	0.433233	0.411283
2015-11-18	17:20:16	0.437149	0.403807
2015-11-18	17:36:48	0.441107	0.404384
2015-11-18	23:52:11	0.443977	0.421273
2015-11-19	00:07:40	0.446897	0.413911
2015-11-19	06:14:48	0.448329	0.409926
2015-11-19	06:34:02	0.449528	0.430007
2015-11-19	12:40:34	0.447255	0.451717
2015-11-19	12:57:03	0.44151	0.443457
2015-11-19	19:17:23	0.434393	0.43463
2015-11-20	02:04:17	0.432683	0.422474
2015-11-20	08:16:58	0.426546	0.411401
2015-11-20	08:44:55	0.422655	0.396796
2015-11-20	14:57:26	0.420405	0.39842
2015-11-20	15:15:26	0.419795	0.405647
2015-11-20	21:21:50	0.412914	0.396301
2015-11-20	21:36:38	0.408863	0.398837
2015-11-21	03:50:08	0.403791	0.390287
2015-11-21	04:05:27	0.407263	0.38229
2015-11-21	10:12:06	0.41183	0.376355
2015-11-21	16:54:36	0.417494	0.390618
2015-11-21	23:05:01	0.424254	0.388161
2015-11-21	23:20:12	0.433509	0.397296
2015-11-22	05:37:36	0.433718	0.405839
2015-11-22	05:53:44	0.433459	0.412543
2015-11-22	12:09:20	0.431766	0.403481
2015-11-22	12:24:27	0.428639	0.396527
2015-11-22	18:36:50	0.423094	0.387457
2015-11-23	01:11:33	0.421819	0.376748
2015-11-23	07:21:33	0.418913	0.373818
2015-11-23	07:41:44	0.417966	0.383748
2015-11-23	13:40:18	0.416681	0.387509
2015-11-23	13:55:09	0.415057	0.391861
2015-11-23	20:09:48	0.408989	0.384733
2015-11-23	20:25:21	0.403247	0.370511
2015-11-24	02:23:19	0.395207	0.353831
2015-11-24	02:39:48	0.388358	0.345679
2015-11-24	08:43:29	0.386137	0.346672
2015-11-24	08:59:07	0.386368	0.357313
2015-11-24	14:24:04	0.380498	0.358326
2015-11-24	14:41:45	0.368528	0.363828
2015-11-24	19:50:27	0.349265	0.386899
2015-11-24	20:04:24	0.319274	0.395975
2015-11-25	00:47:05	0.28073	0.390794
2015-11-25	01:00:29	0.24494	0.391664
2015-11-25	05:33:46	0.268862	0.395612
2015-11-25	05:52:51	0.303533	0.383411
2015-11-25	10:25:26	0.377287	0.414245
2015-11-25	10:47:55	0.458224	0.45728
2015-11-25	15:25:03	0.547424	0.521179
2015-11-25	15:39:13	0.58793	0.580028
2015-11-25	20:35:15	0.628705	0.639477
2015-11-25	20:49:29	0.641415	0.65928
2015-11-26	01:25:31	0.65796	0.684684
2015-11-26	01:39:40	0.670508	0.689385
2015-11-26	06:24:47	0.677316	0.677593
2015-11-26	06:38:47	0.679999	0.66095
2015-11-26	11:20:50	0.670469	0.641679
2015-11-26	11:35:12	0.659726	0.624399
2015-11-26	16:19:18	0.647324	0.578448
2015-11-26	16:33:40	0.635009	0.547198
2015-11-26	21:33:58	0.621163	0.51566
2015-11-26	21:47:14	0.613877	0.481448
2015-11-27	02:24:57	0.602149	0.448141
2015-11-27	02:38:41	0.593514	0.44608
2015-11-27	07:40:52	0.584749	0.441848
2015-11-27	07:55:21	0.576307	0.464026
2015-11-27	12:34:12	0.559532	0.461605
2015-11-27	12:48:01	0.542505	0.482531
2015-11-27	17:14:57	0.522131	0.468328
2015-11-27	22:37:08	0.501636	0.504664
2015-11-28	03:17:28	0.480563	0.497038
2015-11-28	03:31:51	0.471576	0.528483
2015-11-28	08:09:20	0.495603	0.519716
2015-11-28	08:23:01	0.531821	0.545697
2015-11-28	12:59:30	0.554175	0.523472
2015-11-28	13:13:04	0.579083	0.513936
2015-11-28	17:47:48	0.60532	0.506951
2015-11-28	18:01:23	0.603879	0.5128
2015-11-28	22:33:24	0.595581	0.515379
2015-11-28	22:47:43	0.606482	0.527364
2015-11-29	03:28:56	0.620164	0.541079
2015-11-29	03:42:20	0.621036	0.542413
2015-11-29	08:25:18	0.622654	0.540464
2015-11-29	08:39:31	0.621277	0.544481
2015-11-29	13:17:19	0.615606	0.551979
2015-11-29	13:37:01	0.605639	0.565573
2015-11-29	18:20:54	0.604186	0.575364
2015-11-29	18:34:37	0.597693	0.585825
2015-11-30	00:46:04	0.589899	0.588129
2015-11-30	01:01:22	0.584196	0.581111
2015-11-30	07:21:36	0.587647	0.57668
2015-11-30	07:37:25	0.607248	0.577059
2015-11-30	13:46:38	0.627124	0.613215
2015-11-30	14:01:24	0.647276	0.65585
2015-11-30	20:08:10	0.665613	0.664578
2015-11-30	20:24:03	0.67507	0.665226
2015-12-01	02:26:45	0.668655	0.681883
2015-12-01	02:41:22	0.665184	0.668461
2015-12-01	08:40:17	0.676079	0.655136
2015-12-01	08:55:43	0.687666	0.674222
2015-12-01	14:58:53	0.686991	0.709302
2015-12-01	15:14:02	0.674056	0.72582
2015-12-01	21:22:18	0.645915	0.709147
2015-12-01	21:37:51	0.591147	0.686755
2015-12-02	03:53:01	0.600753	0.698324
2015-12-02	04:08:50	0.622576	0.698697
2015-12-02	10:26:25	0.666374	0.707567
2015-12-02	10:41:14	0.721146	0.725867
2015-12-02	16:46:07	0.78481	0.734836
2015-12-02	17:01:08	0.780039	0.704961
2015-12-02	21:37:33	0.771944	0.661763
2015-12-02	21:51:29	0.750767	0.60543
2015-12-03	02:28:58	0.727508	0.580808
2015-12-03	02:43:26	0.70865	0.557411
2015-12-03	08:50:00	0.683245	0.547776
2015-12-03	09:04:43	0.67443	0.550633
2015-12-03	15:11:10	0.670877	0.590178
2015-12-03	15:25:40	0.672584	0.617989
2015-12-03	21:34:02	0.675153	0.648382
2015-12-03	21:49:23	0.689528	0.661452
2015-12-04	03:50:02	0.692573	0.689048
2015-12-04	04:04:38	0.69591	0.683862
2015-12-04	08:44:26	0.658556	0.682348
2015-12-04	08:58:59	0.61518	0.68595
2015-12-04	13:47:47	0.572711	0.681641
2015-12-04	14:02:09	0.531147	0.712951
2015-12-04	18:40:41	0.490197	0.732826
2015-12-04	18:54:33	0.490844	0.743064
2015-12-04	23:39:58	0.498418	0.75205
2015-12-04	23:57:26	0.533301	0.768208
2015-12-05	04:42:36	0.582421	0.746211
2015-12-05	04:58:06	0.633189	0.738918
2015-12-05	09:30:06	0.68767	0.734401
2015-12-05	09:44:01	0.757713	0.738377
2015-12-05	14:20:44	0.78879	0.725382
2015-12-05	14:35:03	0.793971	0.720116
2015-12-05	20:54:01	0.785845	0.717434
2015-12-05	21:12:47	0.762348	0.703612
2015-12-06	03:24:10	0.71163	0.687753
2015-12-06	03:42:35	0.674117	0.689541
2015-12-06	08:24:17	0.629956	0.670479
2015-12-06	08:38:20	0.587909	0.647151
2015-12-06	14:32:37	0.556719	0.66618
2015-12-06	14:50:35	0.536385	0.680706
2015-12-06	20:55:21	0.513704	0.680566
2015-12-06	21:16:29	0.508526	0.678244
2015-12-07	03:23:32	0.512091	0.680771
2015-12-07	03:39:26	0.503253	0.650045
2015-12-07	09:47:22	0.490852	0.621725
2015-12-07	10:03:27	0.485087	0.616772
2015-12-07	10:38:17	0.469631	0.617169
2015-12-07	10:51:21	0.458823	0.614481
2015-12-07	11:25:16	0.467589	0.619023
2015-12-07	11:38:27	0.491487	0.632142
2015-12-07	12:11:10	0.509071	0.648369
2015-12-07	12:24:10	0.530626	0.666687
2015-12-07	17:12:31	0.544502	0.679897
2015-12-07	17:32:21	0.548177	0.691566
2015-12-07	19:42:35	0.53725	0.710985
2015-12-07	19:55:40	0.522973	0.724818
2015-12-07	22:02:56	0.511385	0.735438
2015-12-07	22:15:18	0.499797	0.747397
2015-12-08	00:21:32	0.488208	0.754466
2015-12-08	00:35:27	0.47662	0.743668
2015-12-08	01:44:17	0.465032	0.728354
2015-12-08	02:00:41	0.453443	0.709521
2015-12-08	03:06:17	0.441855	0.703236
2015-12-08	03:17:49	0.46614	0.696309
2015-12-08	04:24:42	0.486359	0.691236
2015-12-08	04:36:49	0.50388	0.690474
2015-12-08	05:44:26	0.532234	0.692594
2015-12-08	06:00:05	0.556136	0.692997
2015-12-08	07:09:01	0.546893	0.696859
2015-12-08	07:25:05	0.533454	0.70108
2015-12-08	07:58:50	0.537337	0.705996
2015-12-08	08:09:49	0.53652	0.712365
2015-12-08	08:44:18	0.538685	0.709621
2015-12-08	08:55:23	0.546371	0.706506
2015-12-08	09:27:45	0.573605	0.709721
2015-12-08	09:39:14	0.58473	0.718076
2015-12-08	10:13:46	0.607894	0.729558
2015-12-08	07:38:16	0.645066	0.744919
2015-12-08	07:47:05	0.679066	0.762268
2015-12-08	07:58:58	0.697132	0.769505
2015-12-08	08:06:10	0.735622	0.77772
2015-12-08	08:16:16	0.755023	0.778502
2015-12-08	08:48:40	0.759593	0.78336
2015-12-08	09:00:51	0.768769	0.7902
2015-12-08	09:59:37	0.785884	0.802376
2015-12-08	10:12:46	0.789689	0.811895
2015-12-08	11:11:48	0.802984	0.828666
2015-12-08	11:27:02	0.817116	0.842279
2015-12-08	13:15:47	0.779085	0.829023
2015-12-08	13:30:30	0.734686	0.812176
2015-12-08	17:45:26	0.688216	0.808637
2015-12-08	18:01:53	0.636727	0.802531
2015-12-08	22:22:35	0.59025	0.782379
2015-12-08	22:38:38	0.589806	0.711855
2015-12-09	02:55:34	0.595992	0.711297
2015-12-09	03:12:15	0.581268	0.691856
2015-12-09	07:32:40	0.538902	0.657657
2015-12-09	07:48:38	0.522488	0.6339
2015-12-09	12:24:06	0.474814	0.673746
2015-12-09	12:35:17	0.459442	0.648765
2015-12-09	17:17:00	0.47704	0.660749
2015-12-09	17:28:05	0.534335	0.682535
2015-12-09	21:42:40	0.577736	0.732512
2015-12-09	21:52:27	0.664455	0.783386
2015-12-10	02:09:23	0.730928	0.836764
2015-12-10	02:22:08	0.785069	0.851731
2015-12-10	06:39:42	0.836009	0.876625
2015-12-10	06:50:06	0.872053	0.876242
2015-12-10	11:05:35	0.897136	0.883217
2015-12-10	11:16:12	0.918098	0.896541
2015-12-10	15:29:09	0.936222	0.881296
2015-12-10	15:39:26	0.942379	0.876887
2015-12-10	19:58:16	0.948263	0.883463
2015-12-10	20:08:30	0.949938	0.892806
2015-12-11	00:28:52	0.940566	0.883883
2015-12-11	00:39:29	0.931663	0.906832
2015-12-11	04:56:02	0.922132	0.900719
2015-12-11	05:08:36	0.915249	0.879705
2015-12-11	09:27:52	0.909426	0.853072
2015-12-11	09:37:55	0.907258	0.836888
2015-12-11	13:56:38	0.890439	0.800355
2015-12-11	14:08:16	0.870557	0.776435
2015-12-11	18:02:45	0.853899	0.762141
2015-12-11	18:12:58	0.842055	0.770689
2015-12-11	21:59:03	0.832428	0.785315
2015-12-11	22:10:05	0.842856	0.825072
2015-12-12	02:17:08	0.862849	0.864303
2015-12-12	02:27:47	0.867741	0.883481
2015-12-12	06:20:05	0.880334	0.888124
2015-12-12	06:29:56	0.896908	0.889615
2015-12-12	10:29:27	0.913745	0.884287
2015-12-12	10:41:56	0.921901	0.882363
2015-12-12	14:39:20	0.939077	0.877455
2015-12-12	14:49:19	0.942473	0.869171
2015-12-12	19:06:25	0.935807	0.861923
2015-12-12	19:17:31	0.922797	0.856847
2015-12-12	23:35:35	0.912388	0.853154
2015-12-12	23:46:17	0.89244	0.850705
2015-12-13	04:01:17	0.875731	0.840872
2015-12-13	04:11:50	0.858901	0.805449
2015-12-13	08:06:44	0.85276	0.790173
2015-12-13	08:20:04	0.854128	0.779754
2015-12-13	11:05:51	0.864022	0.783958
2015-12-13	11:14:47	0.872294	0.797539
2015-12-13	15:28:50	0.881898	0.788371
2015-12-13	15:39:29	0.882024	0.769267
2015-12-13	19:53:53	0.875853	0.735416
2015-12-13	20:04:24	0.871906	0.706924
2015-12-14	00:18:44	0.867552	0.666418
2015-12-14	00:28:43	0.850796	0.657074
2015-12-14	04:41:11	0.822394	0.627338
2015-12-14	04:53:43	0.787247	0.595088
2015-12-14	09:10:05	0.747407	0.53794
2015-12-14	09:20:42	0.711131	0.49177
2015-12-14	13:36:54	0.680865	0.449562
2015-12-14	13:47:51	0.6542	0.417824
2015-12-14	18:00:24	0.639915	0.406101
2015-12-14	18:10:20	0.635956	0.409499
2015-12-14	21:59:24	0.634069	0.470973
2015-12-14	22:11:48	0.644207	0.531824
2015-12-15	01:27:09	0.668025	0.610763
2015-12-15	01:40:16	0.696822	0.668411
2015-12-15	05:54:37	0.702955	0.715865
2015-12-15	06:06:54	0.696239	0.702715
2015-12-15	10:23:35	0.694477	0.702324
2015-12-15	10:35:29	0.680838	0.673981
2015-12-15	14:48:56	0.654746	0.666448
2015-12-15	14:59:36	0.64384	0.665415
2015-12-15	19:10:42	0.63831	0.662796
2015-12-15	19:23:53	0.620349	0.653774
2015-12-15	23:30:34	0.60679	0.658539
2015-12-15	23:41:42	0.589109	0.641739
2015-12-16	03:51:46	0.590854	0.637266
2015-12-16	04:02:55	0.594955	0.638362
2015-12-16	08:14:59	0.605259	0.64623
2015-12-16	08:25:56	0.61601	0.646033
2015-12-16	12:41:18	0.622979	0.64091
2015-12-16	12:51:17	0.612983	0.628725
2015-12-16	17:12:37	0.597877	0.608116
2015-12-16	17:23:34	0.573817	0.581034
2015-12-16	21:29:55	0.546559	0.544695
2015-12-16	21:40:13	0.524452	0.51768
2015-12-17	01:55:28	0.497132	0.49987
2015-12-17	02:11:55	0.489628	0.497895
2015-12-17	06:25:04	0.490971	0.495044
2015-12-17	06:35:40	0.504226	0.51056
2015-12-17	10:46:09	0.508554	0.517693
2015-12-17	10:57:07	0.514566	0.517319
2015-12-17	15:19:00	0.50804	0.520477
2015-12-17	15:30:37	0.499947	0.527618
2015-12-17	19:42:23	0.487221	0.543653
2015-12-17	19:53:28	0.4907	0.567754
2015-12-18	00:07:33	0.499775	0.58397
2015-12-18	00:18:06	0.50885	0.593051
2015-12-18	03:36:03	0.517926	0.592477
2015-12-18	03:45:48	0.527407	0.577698
2015-12-18	06:33:50	0.536639	0.568434
2015-12-18	06:42:35	0.545873	0.569251
2015-12-18	10:57:03	0.55658	0.54469
2015-12-18	11:07:29	0.565251	0.526681
2015-12-18	15:13:50	0.571368	0.537858
2015-12-18	15:24:00	0.575586	0.554055
2015-12-18	19:39:15	0.577652	0.558372
2015-12-18	19:50:00	0.576098	0.590199
2015-12-18	23:12:08	0.574429	0.605445
2015-12-18	23:23:03	0.57276	0.589279
2015-12-19	03:01:19	0.571092	0.576296
2015-12-19	03:12:16	0.562306	0.576168
2015-12-19	07:30:14	0.56604	0.556016
2015-12-19	07:41:05	0.574345	0.568682
2015-12-19	11:53:00	0.567814	0.561151
2015-12-19	12:04:46	0.561888	0.555726
2015-12-19	16:19:20	0.560435	0.55986
2015-12-19	16:30:54	0.543817	0.573359
2015-12-19	20:48:02	0.519984	0.555533
2015-12-19	20:59:16	0.508341	0.561095
2015-12-20	01:09:25	0.493447	0.548131
2015-12-20	01:19:58	0.484365	0.529269
2015-12-20	05:41:56	0.479537	0.506066
2015-12-20	05:53:18	0.480667	0.502343
2015-12-20	09:57:53	0.480556	0.501138
2015-12-20	10:08:43	0.490092	0.505319
2015-12-20	14:26:56	0.501167	0.484392
2015-12-20	14:42:50	0.515339	0.472528
2015-12-20	18:51:04	0.530902	0.50114
2015-12-20	19:03:26	0.555056	0.524475
2015-12-20	23:18:09	0.576912	0.514984
2015-12-20	23:38:07	0.598769	0.572904
2015-12-21	03:44:03	0.62784	0.626983
2015-12-21	03:57:20	0.640288	0.62808
2015-12-21	08:09:16	0.657752	0.632854
2015-12-21	08:20:34	0.65868	0.661841
2015-12-21	12:32:14	0.664477	0.655037
2015-12-21	12:43:00	0.646459	0.637331
2015-12-21	16:59:10	0.633124	0.605235
2015-12-21	17:09:42	0.602831	0.563946
2015-12-21	21:20:17	0.577133	0.529178
2015-12-21	21:34:01	0.534624	0.481962
2015-12-22	01:45:20	0.496773	0.449506
2015-12-22	01:55:42	0.463331	0.432114
2015-12-22	06:11:13	0.438872	0.427486
2015-12-22	06:21:56	0.419937	0.422114
2015-12-22	10:34:11	0.416148	0.40935
2015-12-22	10:44:45	0.420437	0.395551
2015-12-22	14:57:24	0.427034	0.403982
2015-12-22	15:08:04	0.431363	0.403764
2015-12-22	19:23:47	0.436884	0.424802
2015-12-22	19:34:01	0.433975	0.458179
2015-12-22	23:39:58	0.429703	0.476562
2015-12-22	23:51:07	0.425003	0.469719
2015-12-23	04:02:10	0.432008	0.475553
2015-12-23	04:16:22	0.435747	0.464048
2015-12-23	08:30:51	0.432875	0.440593
2015-12-23	08:41:03	0.43134	0.431939
2015-12-23	12:56:17	0.424656	0.426562
2015-12-23	13:09:59	0.408549	0.412044
2015-12-23	17:20:30	0.407239	0.410331
2015-12-23	17:32:19	0.42407	0.414417
2015-12-23	21:49:30	0.451095	0.424836
2015-12-23	22:04:56	0.495228	0.436659
2015-12-24	01:59:48	0.548607	0.48883
2015-12-24	02:12:14	0.582799	0.524195
2015-12-24	05:50:13	0.593218	0.547391
2015-12-24	06:01:03	0.590028	0.556916
2015-12-24	10:09:06	0.566087	0.5618
2015-12-24	10:20:33	0.536224	0.529626
2015-12-24	14:32:20	0.512439	0.491358
2015-12-24	14:43:23	0.499319	0.464058
2015-12-24	18:56:05	0.486698	0.445668
2015-12-24	19:06:12	0.48172	0.434181
2015-12-24	23:14:49	0.469555	0.415817
2015-12-24	23:25:27	0.45739	0.414032
2015-12-25	03:39:54	0.445226	0.415533
2015-12-25	03:51:37	0.436352	0.412703
2015-12-25	07:41:36	0.446166	0.429654
2015-12-25	08:01:41	0.459421	0.451085
2015-12-25	12:15:01	0.464082	0.457109
2015-12-25	12:29:38	0.47242	0.46044
2015-12-25	16:45:28	0.476691	0.462428
2015-12-25	16:56:29	0.461498	0.44501
2015-12-25	20:51:54	0.442089	0.419418
2015-12-25	21:04:34	0.430498	0.403063
2015-12-26	01:16:55	0.414455	0.390693
2015-12-26	01:33:18	0.400755	0.381567
2015-12-26	05:45:36	0.394614	0.376096
2015-12-26	05:58:12	0.389428	0.376829
2015-12-26	10:13:04	0.393327	0.386639
2015-12-26	10:25:14	0.399564	0.391864
2015-12-26	14:31:55	0.413637	0.407269
2015-12-26	14:43:20	0.427236	0.422113
2015-12-26	18:51:18	0.446966	0.45661
2015-12-26	19:03:18	0.464696	0.485882
2015-12-26	22:18:33	0.487175	0.517572
2015-12-26	22:29:40	0.506559	0.535698
2015-12-27	02:47:43	0.525943	0.555508
2015-12-27	02:58:51	0.539958	0.553953
2015-12-27	06:50:17	0.551065	0.553122
2015-12-27	07:00:43	0.557636	0.54932
2015-12-27	11:16:12	0.540787	0.531916
2015-12-27	11:27:05	0.515657	0.508578
2015-12-27	15:03:56	0.490452	0.489328
2015-12-27	15:13:04	0.462714	0.462099
2015-12-27	19:25:11	0.434065	0.438924
2015-12-27	19:36:11	0.423395	0.432846
2015-12-27	23:51:22	0.415561	0.425821
2015-12-28	00:03:16	0.406651	0.41407
2015-12-28	04:29:36	0.410723	0.416934
2015-12-28	04:40:18	0.415789	0.419672
2015-12-28	08:48:43	0.429971	0.430565
2015-12-28	08:58:35	0.447655	0.444513
2015-12-28	13:18:43	0.460089	0.457402
2015-12-28	13:29:17	0.454253	0.440495
2015-12-28	17:48:33	0.449971	0.417011
2015-12-28	17:59:05	0.439123	0.384243
2015-12-28	21:30:14	0.427322	0.368231
2015-12-28	21:42:05	0.424398	0.353603
2015-12-29	01:16:59	0.429312	0.36908
2015-12-29	01:28:42	0.433205	0.391894
2015-12-29	05:46:33	0.43335	0.416257
2015-12-29	05:57:00	0.431487	0.426682
2015-12-29	10:12:30	0.439802	0.443973
2015-12-29	10:23:31	0.446393	0.454964
2015-12-29	14:34:21	0.455886	0.51467
2015-12-29	14:45:05	0.471008	0.601662
2015-12-29	19:01:23	0.490017	0.683265
2015-12-29	19:11:35	0.50073	0.754598
2015-12-29	23:25:05	0.515045	0.78732
2015-12-29	23:35:37	0.529361	0.766382
2015-12-30	03:52:18	0.543677	0.72003
2015-12-30	04:03:48	0.543243	0.662335
2015-12-30	08:18:38	0.550402	0.604207
2015-12-30	08:29:16	0.550006	0.57644
2015-12-30	12:38:03	0.554839	0.553834
2015-12-30	12:48:35	0.552885	0.528666
2015-12-30	16:58:08	0.565561	0.542508
2015-12-30	17:09:31	0.570524	0.563875
2015-12-30	20:59:44	0.582921	0.590351
2015-12-30	21:10:06	0.58997	0.612625
2015-12-31	00:01:24	0.603684	0.633547
2015-12-31	00:10:33	0.602668	0.624414
2015-12-31	04:24:42	0.61572	0.624216
2015-12-31	04:35:05	0.627389	0.627035
2015-12-31	08:50:34	0.64005	0.609048
2015-12-31	09:01:24	0.649733	0.589985
2015-12-31	13:10:27	0.670701	0.577677
2015-12-31	13:20:50	0.669754	0.556214
2015-12-31	17:17:26	0.666055	0.550398
2015-12-31	17:30:35	0.657228	0.565705
2015-12-31	21:08:39	0.647247	0.569091
2015-12-31	21:19:25	0.636576	0.585953
2016-01-01	01:29:49	0.656278	0.603788
2016-01-01	06:08:36	0.677851	0.607643
2016-01-01	10:18:17	0.68539	0.614755
2016-01-01	10:28:06	0.701949	0.642925
2016-01-01	14:42:29	0.715296	0.624575
2016-01-01	14:53:00	0.698771	0.604697
2016-01-01	19:14:06	0.677165	0.583691
2016-01-01	19:25:15	0.666382	0.558083
2016-01-01	23:29:52	0.643367	0.552559
2016-01-01	23:40:38	0.620353	0.577657
2016-01-02	04:00:53	0.597338	0.588035
2016-01-02	04:11:18	0.55646	0.591942
2016-01-02	08:21:20	0.539152	0.601443
2016-01-02	08:32:35	0.529518	0.590573
2016-01-02	12:53:19	0.517263	0.580449
2016-01-02	13:04:19	0.505669	0.581537
2016-01-02	17:25:29	0.525678	0.627634
2016-01-02	17:43:29	0.535857	0.667736
2016-01-02	21:50:14	0.552103	0.688982
2016-01-02	22:02:01	0.584709	0.708295
2016-01-03	02:20:47	0.630395	0.740803
2016-01-03	02:35:00	0.667303	0.72632
2016-01-03	06:47:04	0.694534	0.716988
2016-01-03	07:00:25	0.712955	0.724048
2016-01-03	11:11:43	0.72482	0.733804
2016-01-03	11:22:33	0.727802	0.734574
2016-01-03	15:40:30	0.730139	0.743152
2016-01-03	15:52:03	0.732729	0.747237
2016-01-03	20:06:36	0.734706	0.751882
2016-01-03	20:17:11	0.733815	0.75523
2016-01-04	00:36:40	0.732382	0.751999
2016-01-04	00:46:35	0.722328	0.744008
2016-01-04	05:06:36	0.727409	0.745056
2016-01-04	05:17:42	0.731096	0.740037
2016-01-04	09:43:12	0.731913	0.748939
2016-01-04	09:53:59	0.732474	0.768952
2016-01-04	14:17:22	0.739001	0.768326
2016-01-04	14:28:38	0.727737	0.762302
2016-01-04	18:47:31	0.715213	0.737635
2016-01-04	19:00:42	0.702903	0.701274
2016-01-04	23:16:19	0.688195	0.652354
2016-01-04	23:28:05	0.673487	0.627116
2016-01-05	03:43:30	0.658778	0.594584
2016-01-05	03:54:22	0.635181	0.580064
2016-01-05	08:13:06	0.616467	0.576811
2016-01-05	08:24:09	0.60466	0.590556
2016-01-05	12:44:00	0.592432	0.599239
2016-01-05	12:55:41	0.585124	0.611151
2016-01-05	15:44:40	0.583714	0.591648
2016-01-05	15:53:40	0.574431	0.560291
2016-01-05	20:17:45	0.555252	0.520765
2016-01-05	20:28:15	0.533504	0.484365
2016-01-06	00:49:41	0.503847	0.472607
2016-01-06	01:00:06	0.463993	0.47995
2016-01-06	05:16:33	0.465183	0.49444
2016-01-06	05:27:34	0.477826	0.506996
2016-01-06	09:32:02	0.497333	0.520958
2016-01-06	09:42:37	0.514641	0.507594
2016-01-06	13:35:12	0.547555	0.50494
2016-01-06	13:52:27	0.526546	0.491575
2016-01-06	18:10:36	0.506286	0.490086
2016-01-06	18:22:35	0.491364	0.490006
2016-01-06	22:18:22	0.490845	0.496609
2016-01-06	22:29:18	0.497119	0.505684
2016-01-07	02:46:48	0.528475	0.529525
2016-01-07	02:58:32	0.554773	0.544586
2016-01-07	07:13:31	0.58314	0.561064
2016-01-07	07:23:53	0.604815	0.578867
2016-01-07	11:06:49	0.622075	0.601942
2016-01-07	11:20:14	0.630153	0.613862
2016-01-07	15:37:27	0.635396	0.597563
2016-01-07	15:48:45	0.630676	0.581582
2016-01-07	19:41:12	0.624752	0.577153
2016-01-07	19:52:05	0.61535	0.567437
2016-01-08	00:12:36	0.607233	0.554112
2016-01-08	00:24:15	0.599403	0.562028
2016-01-08	04:43:09	0.595994	0.567835
2016-01-08	04:54:08	0.591632	0.557634
2016-01-08	09:16:21	0.588564	0.550661
2016-01-08	09:27:10	0.590613	0.550174
2016-01-08	13:43:42	0.596425	0.557719
2016-01-08	13:54:21	0.593557	0.558768
2016-01-08	18:11:11	0.593885	0.582424
2016-01-08	18:21:57	0.595163	0.601008
2016-01-08	22:43:11	0.593568	0.604237
2016-01-08	22:55:32	0.590167	0.602804
2016-01-09	03:09:00	0.59327	0.610964
2016-01-09	03:19:02	0.594035	0.597813
2016-01-09	07:42:06	0.58663	0.598647
2016-01-09	07:53:04	0.586116	0.620249
2016-01-09	12:26:18	0.592246	0.644113
2016-01-09	12:38:02	0.601414	0.663473
2016-01-09	16:59:00	0.604749	0.652292
2016-01-09	17:09:59	0.608082	0.629255
2016-01-09	21:32:05	0.596353	0.577012
2016-01-09	21:43:22	0.569809	0.521639
2016-01-10	02:08:54	0.532055	0.476187
2016-01-10	02:25:19	0.500416	0.468813
2016-01-10	06:46:31	0.470733	0.453951
2016-01-10	07:00:31	0.451531	0.454307
2016-01-10	11:21:57	0.460873	0.454724
2016-01-10	11:33:04	0.479411	0.448894
2016-01-10	15:52:00	0.499061	0.438389
2016-01-10	16:02:51	0.523979	0.436133
2016-01-10	20:23:06	0.545643	0.435541
2016-01-10	20:34:13	0.545988	0.436882
2016-01-11	01:01:13	0.544363	0.438002
2016-01-11	01:11:38	0.538927	0.431682
2016-01-11	05:30:37	0.543493	0.426964
2016-01-11	05:41:35	0.541698	0.424828
2016-01-11	10:09:43	0.536367	0.420677
2016-01-11	10:21:26	0.528065	0.413187
2016-01-11	14:17:35	0.530774	0.416819
2016-01-11	14:27:39	0.526509	0.417271
2016-01-11	18:52:12	0.531631	0.41941
2016-01-11	19:04:02	0.543316	0.431705
2016-01-11	23:27:55	0.561	0.452865
2016-01-11	23:39:38	0.574509	0.464616
2016-01-12	02:39:38	0.588019	0.474022
2016-01-12	02:50:17	0.595747	0.484717
2016-01-12	07:01:21	0.606218	0.480278
2016-01-12	07:12:23	0.606654	0.474866
2016-01-12	11:03:07	0.613341	0.476106
2016-01-12	11:14:03	0.630637	0.488317
2016-01-12	15:45:34	0.640151	0.474616
2016-01-12	15:57:54	0.633358	0.469326
2016-01-12	20:23:13	0.623035	0.44046
2016-01-12	20:34:25	0.592897	0.402433
2016-01-13	00:58:54	0.538585	0.361104
2016-01-13	01:10:38	0.493385	0.345268
2016-01-13	05:32:25	0.490199	0.325473
2016-01-13	05:42:14	0.483473	0.319568
2016-01-13	10:00:03	0.495468	0.318681
2016-01-13	10:11:33	0.519321	0.31745
2016-01-13	14:33:49	0.542562	0.313331
2016-01-13	14:45:23	0.532287	0.315296
2016-01-13	19:06:59	0.534052	0.315968
2016-01-13	19:18:03	0.525594	0.315402
2016-01-13	23:43:00	0.513777	0.291967
2016-01-13	23:57:05	0.501961	0.289228
2016-01-14	04:19:34	0.508837	0.29234
2016-01-14	04:30:56	0.52355	0.300326
2016-01-14	08:51:59	0.534141	0.304772
2016-01-14	09:03:33	0.549799	0.327775
2016-01-14	13:33:38	0.569185	0.340055
2016-01-14	13:45:45	0.586051	0.35465
2016-01-14	18:13:20	0.586887	0.332474
2016-01-14	18:24:21	0.583653	0.313844
2016-01-14	22:49:53	0.56716	0.282864
2016-01-14	23:01:03	0.538746	0.242598
2016-01-15	03:23:01	0.485967	0.197626
2016-01-15	03:33:45	0.441749	0.185406
2016-01-15	07:57:51	0.406347	0.172669
2016-01-15	08:11:18	0.381287	0.172988
2016-01-15	12:37:26	0.378821	0.184457
2016-01-15	12:49:30	0.385573	0.186628
2016-01-15	17:15:49	0.39552	0.182401
2016-01-15	17:27:52	0.408406	0.184025
2016-01-15	21:53:11	0.422705	0.194855
2016-01-15	22:04:34	0.426167	0.197225
2016-01-16	02:03:38	0.432165	0.192562
2016-01-16	02:15:22	0.435812	0.203962
2016-01-16	06:41:06	0.44009	0.208715
2016-01-16	06:54:21	0.443101	0.212096
2016-01-16	11:21:10	0.455795	0.207516
2016-01-16	11:34:22	0.465868	0.208768
2016-01-16	16:02:29	0.48096	0.257872
2016-01-16	16:14:11	0.498087	0.307476
2016-01-16	20:22:45	0.519148	0.378906
2016-01-16	20:33:52	0.533193	0.45732
2016-01-16	23:19:23	0.552525	0.520987
2016-01-16	23:29:21	0.571857	0.531119
2016-01-17	03:53:53	0.59119	0.535415
2016-01-17	04:04:34	0.614351	0.508053
2016-01-17	08:31:42	0.637504	0.482556
2016-01-17	08:43:20	0.661588	0.476357
2016-01-17	13:00:50	0.671878	0.471546
2016-01-17	13:12:06	0.625824	0.455818
2016-01-17	16:29:58	0.581	0.472297
2016-01-17	16:40:38	0.541243	0.489827
2016-01-17	19:52:00	0.505615	0.498115
2016-01-17	20:02:11	0.48884	0.502533
2016-01-18	00:32:19	0.533468	0.525291
2016-01-18	00:43:14	0.56774	0.520107
2016-01-18	05:10:12	0.603797	0.507861
2016-01-18	05:21:37	0.629071	0.503635
2016-01-18	09:49:38	0.649681	0.500131
2016-01-18	10:01:30	0.656451	0.499224
2016-01-18	14:33:39	0.664425	0.483448
2016-01-18	14:45:33	0.661463	0.468993
2016-01-18	19:19:20	0.660131	0.47121
2016-01-18	19:30:31	0.65431	0.467638
2016-01-18	23:17:29	0.653178	0.45603
2016-01-18	23:29:42	0.652046	0.453526
2016-01-19	03:36:51	0.650914	0.452197
2016-01-19	03:47:41	0.648473	0.435875
2016-01-19	06:44:41	0.646587	0.419016
2016-01-19	06:55:19	0.646398	0.412652
2016-01-19	11:20:47	0.656381	0.406406
2016-01-19	11:32:20	0.663994	0.406152
2016-01-19	15:58:33	0.672896	0.413079
2016-01-19	16:09:49	0.681222	0.426563
2016-01-19	20:36:56	0.687833	0.440444
2016-01-19	20:48:10	0.684251	0.457101
2016-01-20	01:15:17	0.683021	0.46882
2016-01-20	01:28:46	0.683637	0.471271
2016-01-20	05:59:43	0.680083	0.47452
2016-01-20	06:11:58	0.677939	0.473919
2016-01-20	10:41:07	0.677822	0.470374
2016-01-20	10:51:26	0.680558	0.46969
2016-01-20	15:17:30	0.678952	0.469971
2016-01-20	15:31:45	0.679022	0.467033
2016-01-20	19:55:19	0.675184	0.466599
2016-01-20	20:07:27	0.666825	0.472758
2016-01-20	23:44:55	0.653115	0.47392
2016-01-20	23:55:57	0.64176	0.4771
2016-01-21	04:26:59	0.626653	0.484933
2016-01-21	04:38:49	0.628207	0.489963
2016-01-21	07:52:03	0.643558	0.491706
2016-01-21	08:02:37	0.65922	0.496739
2016-01-21	12:31:40	0.648532	0.498855
2016-01-21	12:45:52	0.661031	0.496063
2016-01-21	17:08:14	0.664185	0.493546
2016-01-21	17:19:46	0.660859	0.493709
2016-01-21	21:50:40	0.664539	0.483313
2016-01-21	22:05:00	0.699531	0.469682
2016-01-22	02:15:41	0.722403	0.467666
2016-01-22	02:27:48	0.735179	0.461906
2016-01-22	05:41:39	0.760957	0.453474
2016-01-22	05:53:03	0.77892	0.460504
2016-01-22	10:21:25	0.792915	0.470565
2016-01-22	10:33:15	0.800258	0.471454
2016-01-22	14:30:42	0.813022	0.477229
2016-01-22	14:42:38	0.807236	0.484383
2016-01-22	18:02:00	0.797229	0.485695
2016-01-22	18:12:48	0.779155	0.483986
2016-01-22	22:44:48	0.755698	0.468444
2016-01-22	22:56:31	0.72488	0.454246
2016-01-23	03:26:51	0.687575	0.44325
2016-01-23	03:39:10	0.676527	0.429139
2016-01-23	08:04:07	0.671362	0.419441
2016-01-23	08:16:04	0.675288	0.421347
2016-01-23	12:41:50	0.695737	0.420452
2016-01-23	12:54:10	0.726764	0.416603
2016-01-23	17:27:47	0.736183	0.440638
2016-01-23	17:39:33	0.744365	0.469341
2016-01-23	22:10:06	0.748103	0.469342
2016-01-23	22:20:52	0.739966	0.464941
2016-01-24	02:50:41	0.725897	0.481849
2016-01-24	03:02:21	0.717361	0.476408
2016-01-24	07:11:46	0.709834	0.463877
2016-01-24	07:24:01	0.70718	0.483322
2016-01-24	11:50:36	0.713466	0.516852
2016-01-24	12:02:49	0.714193	0.524281
2016-01-24	16:35:23	0.710699	0.511246
2016-01-24	16:47:41	0.707508	0.500955
2016-01-24	20:42:51	0.700753	0.480856
2016-01-24	20:55:00	0.686371	0.449181
2016-01-25	01:24:35	0.678857	0.42908
2016-01-25	01:36:10	0.67014	0.423699
2016-01-25	06:11:17	0.674337	0.416197
2016-01-25	06:23:20	0.668416	0.414607
2016-01-25	10:48:04	0.671486	0.417028
2016-01-25	10:59:09	0.674854	0.414225
2016-01-25	15:31:39	0.678901	0.423547
2016-01-25	15:44:09	0.669509	0.434278
2016-01-25	20:12:52	0.669708	0.4431
2016-01-25	20:24:25	0.660393	0.44659
2016-01-26	00:56:41	0.650253	0.455751
2016-01-26	01:10:50	0.643121	0.458594
2016-01-26	05:35:03	0.631774	0.460218
2016-01-26	05:47:31	0.634696	0.466354
2016-01-26	10:21:09	0.64199	0.478215
2016-01-26	10:33:08	0.653346	0.483214
2016-01-26	15:03:44	0.662795	0.489628
2016-01-26	15:15:44	0.677561	0.502131
2016-01-26	19:19:30	0.679159	0.512511
2016-01-26	19:35:05	0.677487	0.517714
2016-01-27	00:00:16	0.672854	0.507115
2016-01-27	00:17:11	0.66822	0.516782
2016-01-27	04:28:27	0.66374	0.519985
2016-01-27	04:42:53	0.630069	0.516337
2016-01-27	09:07:20	0.63509	0.519329
2016-01-27	09:19:46	0.640858	0.535584
2016-01-27	13:53:20	0.622534	0.527475
2016-01-27	14:07:27	0.60823	0.514929
2016-01-27	18:40:32	0.62729	0.539295
2016-01-27	18:53:26	0.611832	0.556752
2016-01-27	22:55:05	0.599801	0.55698
2016-01-27	23:07:24	0.616035	0.554616
2016-01-28	03:34:07	0.63227	0.573753
2016-01-28	03:47:04	0.631112	0.566828
2016-01-28	08:14:26	0.619751	0.553695
2016-01-28	08:27:47	0.615052	0.558091
2016-01-28	13:00:42	0.625242	0.578992
2016-01-28	13:14:23	0.632716	0.588147
2016-01-28	17:45:12	0.649795	0.579914
2016-01-28	17:58:20	0.669287	0.582164
2016-01-28	22:18:36	0.674328	0.583997
2016-01-28	22:31:26	0.656693	0.573677
2016-01-29	01:21:38	0.633983	0.548124
2016-01-29	01:30:53	0.629172	0.553156
2016-01-29	06:00:13	0.638482	0.550087
2016-01-29	06:13:30	0.645694	0.549521
2016-01-29	10:42:41	0.655861	0.549898
2016-01-29	10:55:17	0.675601	0.563364
2016-01-29	15:29:09	0.68084	0.555489
2016-01-29	15:41:49	0.675356	0.553123
2016-01-29	20:11:27	0.675368	0.564152
2016-01-29	20:24:34	0.675822	0.571237
2016-01-30	00:32:48	0.670101	0.569977
2016-01-30	00:44:53	0.661708	0.570457
2016-01-30	05:03:47	0.657572	0.566306
2016-01-30	05:14:55	0.655464	0.543538
2016-01-30	09:17:43	0.647913	0.531792
2016-01-30	09:29:44	0.654615	0.53141
2016-01-30	13:36:12	0.664943	0.538961
2016-01-30	13:49:14	0.667964	0.553447
2016-01-30	18:23:09	0.672303	0.567304
2016-01-30	18:34:13	0.685429	0.569102
2016-01-30	21:44:13	0.687649	0.564696
2016-01-30	21:54:56	0.692259	0.553054
2016-01-31	02:27:59	0.703264	0.549988
2016-01-31	02:44:08	0.717155	0.547762
2016-01-31	07:27:50	0.725645	0.546583
2016-01-31	07:39:07	0.719897	0.549134
2016-01-31	12:13:29	0.711671	0.553115
2016-01-31	12:25:03	0.722206	0.548706
2016-01-31	17:06:06	0.72589	0.54684
2016-01-31	17:17:56	0.73101	0.544068
2016-01-31	21:54:13	0.746402	0.546088
2016-01-31	22:06:18	0.760306	0.529783
2016-02-01	02:08:59	0.751484	0.538746
2016-02-01	02:20:19	0.755465	0.555288
2016-02-01	07:08:06	0.764956	0.587796
2016-02-01	07:21:12	0.780502	0.623074
2016-02-01	10:21:49	0.78052	0.674778
2016-02-01	11:17:35	0.808366	0.713382
2016-02-01	14:39:02	0.822594	0.721727
2016-02-01	14:51:33	0.830496	0.728028
2016-02-01	19:20:02	0.831529	0.742515
2016-02-01	19:35:05	0.847276	0.758759
2016-02-01	22:48:54	0.834379	0.750071
2016-02-01	23:01:32	0.821482	0.764301
2016-02-02	03:29:08	0.808585	0.769715
2016-02-02	03:44:00	0.801578	0.761901
2016-02-02	07:01:12	0.800128	0.754292
2016-02-02	07:13:41	0.803222	0.764019
2016-02-02	11:50:11	0.795018	0.767936
2016-02-02	12:02:22	0.793887	0.770827
2016-02-02	16:39:58	0.790137	0.783887
2016-02-02	16:51:14	0.7841	0.797209
2016-02-02	21:26:01	0.77679	0.799889
2016-02-02	21:44:09	0.784048	0.806365
2016-02-03	01:44:28	0.787505	0.813059
2016-02-03	01:55:39	0.787166	0.800276
2016-02-03	05:16:43	0.797324	0.79533
2016-02-03	05:27:10	0.80283	0.794091
2016-02-03	09:45:59	0.809274	0.797999
2016-02-03	09:57:20	0.805101	0.799393
2016-02-03	14:38:19	0.799867	0.806479
2016-02-03	14:50:14	0.779283	0.803979
2016-02-03	19:29:47	0.758494	0.826009
2016-02-03	19:43:06	0.731913	0.849565
2016-02-04	00:11:57	0.711093	0.86071
2016-02-04	00:23:52	0.690273	0.865423
2016-02-04	05:01:51	0.711054	0.873368
2016-02-04	05:16:42	0.729625	0.851899
2016-02-04	09:53:23	0.764432	0.837943
2016-02-04	10:08:12	0.806978	0.840489
2016-02-04	14:45:01	0.849123	0.829909
2016-02-04	14:57:32	0.849265	0.816474
2016-02-04	18:53:57	0.851216	0.831488
2016-02-04	19:06:45	0.836529	0.834443
2016-02-04	23:44:40	0.813701	0.811754
2016-02-04	23:57:07	0.790873	0.807724
2016-02-05	04:28:10	0.768046	0.798647
2016-02-05	04:43:28	0.757928	0.776274
2016-02-05	07:41:34	0.741548	0.750285
2016-02-05	07:52:43	0.728948	0.741608
2016-02-05	12:25:36	0.717541	0.726129
2016-02-05	12:42:24	0.719663	0.721777
2016-02-05	15:52:27	0.710788	0.723097
2016-02-05	16:03:51	0.709886	0.729241
2016-02-05	20:34:49	0.706917	0.726279
2016-02-05	20:46:50	0.704466	0.727645
2016-02-06	01:19:29	0.6902	0.719899
2016-02-06	01:31:34	0.696763	0.714402
2016-02-06	05:52:36	0.697453	0.70684
2016-02-06	06:05:48	0.693274	0.71253
2016-02-06	10:38:15	0.705953	0.724055
2016-02-06	10:49:46	0.724032	0.740488
2016-02-06	15:16:47	0.721878	0.724037
2016-02-06	15:41:03	0.726195	0.710463
2016-02-06	20:13:35	0.735978	0.696183
2016-02-06	20:25:47	0.729502	0.676925
2016-02-06	23:27:32	0.718222	0.648746
2016-02-06	23:38:56	0.706943	0.632968
2016-02-07	04:03:17	0.695664	0.62665
2016-02-07	04:17:39	0.682571	0.622265
2016-02-07	08:35:27	0.662603	0.618027
2016-02-07	08:49:35	0.645726	0.624756
2016-02-07	13:03:01	0.638845	0.626808
2016-02-07	13:14:52	0.643562	0.621596
2016-02-07	17:42:25	0.652349	0.626003
2016-02-07	17:57:51	0.670267	0.632074
2016-02-07	22:15:09	0.687349	0.670845
2016-02-07	22:26:53	0.696692	0.715132
2016-02-08	02:52:08	0.696692	0.751033
2016-02-08	03:03:22	0.696692	0.770413
2016-02-08	03:53:34	0.696692	0.798477
2016-02-08	04:02:37	NaN	NaN
2016-02-08	04:38:21	NaN	NaN
